# Supplementary material for: New Janus Tricyclic Laddersiloxanes: Synthesis, Characterization, and Reactivity
Source: MDPI journal article supplement (doi:10.3390/molecules28155699), 2023-07-27
Supplement: s1 [file s1]

Supplementary Materials

# New Janus Tricyclic Laddersiloxanes: Synthesis, Characterization, and Reactivity

Yujia Liu <sup>1,\*</sup>, Midori Tokuda <sup>1</sup>, Nobuhiro Takeda <sup>1</sup>, Armelle Ouali <sup>2,\*</sup> and Masafumi Unno <sup>1,\*</sup>

<sup>1</sup> Department of Chemistry and Chemical Biology, Gunma University, 1-5-1 Tenjin-cho, Kiryu 376-8515, Japan; midori.tokuda@gmail.com (M.T.); ntakeda@gunma-u.ac.jp (N.T.)

<sup>2</sup> ICGM, Univ. Montpellier, CNRS, ENSCM, 1919 Route de Mende, 34293 Montpellier, CEDEX 05, France

\* Correspondence: yliu@gunma-u.ac.jp (Y.L.); armelle.ouali@enscm.fr (A.O.); unno@gunma-u.ac.jp (M.U.); Tel.: +81-27-730-1230 (M.U.)

| Table of contents                                                                                                                                                                  | Pages |
|------------------------------------------------------------------------------------------------------------------------------------------------------------------------------------|-------|
| 1. Characterization data for synthetic compounds <b>6-14</b>                                                                                                                       | S2    |
| 2. <sup>1</sup> H, <sup>13</sup> C, <sup>29</sup> Si, <sup>1</sup> H- <sup>1</sup> H COSY and <sup>1</sup> H- <sup>13</sup> C HSQC NMR spectra for synthetic compounds <b>6-15</b> | S6    |
| 3. MALDI-TOF MS Spectra for synthetic compounds <b>6-15</b>                                                                                                                        | S30   |
| 4. Thermogravimetry/Differential Thermal Analysis (TG/DTA) for compounds <b>6-14</b>                                                                                               | S35   |

## 1. Characterization data for synthetic compounds 6-14

### 6-8-6 tricyclic laddersiloxane (6)

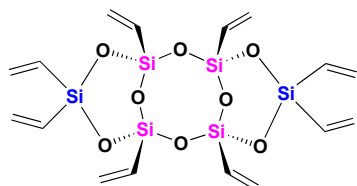

$^1\text{H}$  NMR (600.17 MHz,  $\text{CDCl}_3$ ):  $\delta$  = 5.95–6.16 (m, 24H) ppm.

$^{29}\text{Si}$  NMR (119.24 MHz,  $\text{CDCl}_3$ ):  $\delta$  = −35.21, −69.15 ppm.

$^{13}\text{C}$  NMR (150.91 MHz,  $\text{CDCl}_3$ ):  $\delta$  = 128.65, 132.64, 133.07, 136.44, 137.39, 137.85 ppm.

MALDI-TOF MS ( $m/z$ ): 514.96 ( $[\text{M}+\text{H}]^+$ , calcd 514.02).

Elemental analysis: Calcd for  $\text{C}_{16}\text{H}_{24}\text{O}_8\text{Si}_6$ : C, 37.47; H, 4.72. Found: C, 37.15; H, 4.79.

### 6-8-6 tricyclic laddersiloxane (7)

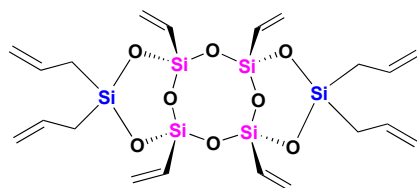

$^1\text{H}$  NMR (600.17 MHz,  $\text{CDCl}_3$ ):  $\delta$  = 1.74 (d,  $J$  = 7.90 Hz, 4H), 1.80 (d,  $J$  = 7.90 Hz, 4H), 4.93–5.04 (m, 8H), 5.74–5.86 (m, 4H), 5.95 (dd,  $J$  = 20.62, 14.43 Hz, 4H), 6.07 (dd,  $J$  = 20.62, 4.12 Hz, 4H), 6.14 (dd,  $J$  = 14.43, 4.12 Hz, 4H) ppm.

$^{29}\text{Si}$  NMR (119.24 MHz,  $\text{CDCl}_3$ ):  $\delta$  = −15.78, −69.17 ppm.

$^{13}\text{C}$  NMR (150.91 MHz,  $\text{CDCl}_3$ ):  $\delta$  = 22.23, 23.25, 115.99, 116.06, 128.60, 131.45, 131.58, 137.83 ppm.

MALDI-TOF MS ( $m/z$ ): 570.76 ( $[\text{M}+\text{H}]^+$ , calcd 570.08).

Elemental analysis: Calcd for  $\text{C}_{20}\text{H}_{32}\text{O}_8\text{Si}_6 \cdot \text{H}_2\text{O}$ : C, 40.92; H, 5.84. Found: C, 40.77; H, 5.85.

### 6-8-6 tricyclic laddersiloxane (8)

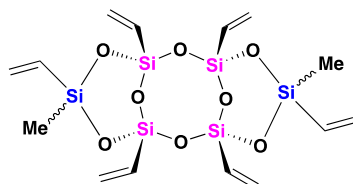

$^1\text{H}$  NMR (600.17 MHz,  $\text{CDCl}_3$ ):  $\delta$  = 0.31–0.38 (m, 6H), 5.94–6.13 (m, 18H) ppm.

$^{29}\text{Si}$  NMR (119.24 MHz,  $\text{CDCl}_3$ ):  $\delta$  = −19.29, −19.39, −19.64, −19.77, −69.19, −69.25 ppm.

$^{13}\text{C}$  NMR (150.91 MHz,  $\text{CDCl}_3$ ):  $\delta$  = −1.09, −0.82, −0.79, −0.73, 128.68, 128.76, 128.85, 128.89, 134.16, 134.40, 134.85, 134.93, 135.03, 135.10, 135.90, 136.16, 137.63, 137.66, 137.73, 137.79 ppm.

MALDI-TOF MS ( $m/z$ ): 486.89 ( $[\text{M}+\text{H}]^+$ , calcd 486.02).

Elemental analysis: Calcd for  $\text{C}_{14}\text{H}_{24}\text{O}_8\text{Si}_6 \cdot 0.5\text{H}_2\text{O}$ : C, 33.78, H, 5.06. Found: C, 33.75; H, 5.03.

**6-8-6 tricyclic laddersiloxane (9)**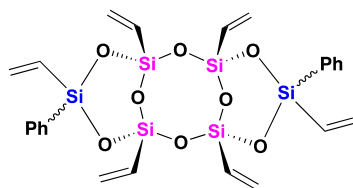

$^1\text{H}$  NMR (600.17 MHz,  $\text{CDCl}_3$ ):  $\delta$  = 5.33 (dd,  $J$  = 19.59, 15.12 Hz, 0.33H), 5.39 (dd,  $J$  = 14.78, 4.47 Hz, 0.33H), 5.52 (dd,  $J$  = 19.59, 4.47 Hz, 0.33H), 5.89–6.24 (m, 16.68H), 6.29 (dd,  $J$  = 19.93, 14.78 Hz, 0.33H), 6.99 (t,  $J$  = 7.90 Hz, 1H), 7.22–7.24 (m, 0.5H), 7.35–7.47 (m, 6H), 7.56 (dd,  $J$  = 7.90, 1.37 Hz, 1H), 7.66 (dd,  $J$  = 7.90, 1.37 Hz, 0.5H), 7.76 (dd,  $J$  = 7.90, 1.37 Hz, 1H) ppm.

$^{29}\text{Si}$  NMR (119.24 MHz,  $\text{CDCl}_3$ ):  $\delta$  = −33.86, −33.96, −34.02, −34.38, −68.40, −68.86, −69.00, −69.17 ppm.

$^{13}\text{C}$  NMR (150.91 MHz,  $\text{CDCl}_3$ ):  $\delta$  = 127.84, 127.94, 128.04, 128.08, 128.52, 128.74, 130.57, 130.63, 130.67, 130.73, 131.62, 132.14, 132.57, 132.80, 133.48, 133.65, 133.89, 133.94, 133.99, 134.01, 134.22, 134.40, 136.37, 136.54, 137.16, 137.46, 137.96, 138.02 ppm.

MALDI-TOF MS ( $m/z$ ): 634.78 ( $[\text{M}+\text{Na}]^+$ , calcd 635.03), 650.71 ( $[\text{M}+\text{K}]^+$ , calcd 651.00).

**6-8-6 tricyclic laddersiloxane (10):**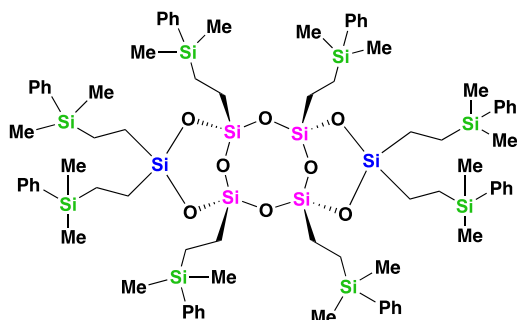

$^1\text{H}$  NMR (600.17 MHz,  $\text{CDCl}_3$ ):  $\delta$  = 0.19–0.28 (m, 48H), 0.52–0.99 (m, 32H), 7.27–7.37 (m, 24H), 7.44–7.49 (m, 16H) ppm.

$^{29}\text{Si}$  NMR (119.24 MHz,  $\text{CDCl}_3$ ):  $\delta$  = −1.12, −1.18, −1.31, −7.94, −55.06 ppm.

$^{13}\text{C}$  NMR (150.91 MHz,  $\text{CDCl}_3$ ):  $\delta$  = −3.50, −3.47, −3.25, 5.08, 6.46, 6.60, 6.68, 6.92, 6.96, 127.69, 127.81, 127.91, 128.85, 129.03, 133.71, 133.84, 133.94, 134.04, 138.99, 139.07, 139.39 ppm.

MALDI-TOF MS ( $m/z$ ): 1623.16 ( $[\text{M}+\text{Na}]^+$ , calcd 1623.56).

Elemental analysis: Calcd for  $\text{C}_{80}\text{H}_{120}\text{O}_8\text{Si}_{14} \cdot 0.5\text{H}_2\text{O}$ : C, 59.28; H, 7.59. Found: C, 59.00; H, 7.61.

**6-8-6 tricyclic laddersiloxane (11):**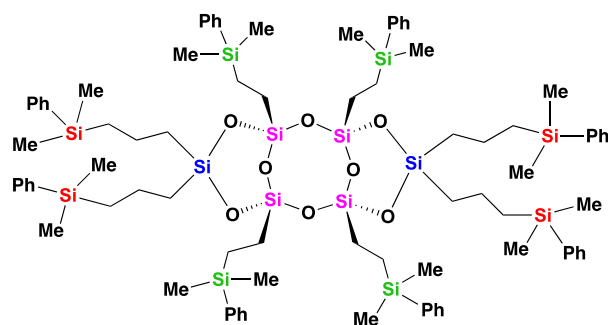

$^1\text{H}$  NMR (600.17 MHz,  $\text{CDCl}_3$ ):  $\delta$  = 0.22 (s, 12H), 0.24 (s, 12H), 0.25 (s, 24H), 0.55–0.82 (m, 32H), 1.40–1.43 (m, 8H), 7.31–7.36 (m, 24H), 7.47–7.49 (m, 16H) ppm.

$^{29}\text{Si}$  NMR (119.24 MHz,  $\text{CDCl}_3$ ):  $\delta$  = −1.16, −3.80, −3.91, −8.46, −55.41 ppm.

$^{13}\text{C}$  NMR (150.91 MHz,  $\text{CDCl}_3$ ):  $\delta$  = −3.48, −3.46, −2.85, −2.81, 5.04, 6.89, 17.27, 17.38, 19.86, 20.02, 20.38, 20.52, 127.85, 127.87, 127.91, 128.88, 128.95, 129.02, 133.60, 133.65, 133.71, 138.98, 139.54, 139.60 ppm.

MALDI-TOF MS ( $m/z$ ): 1680.35 ( $[\text{M}+\text{Na}]^+$ , calcd 1680.63)

Elemental analysis: Calcd for  $\text{C}_{84}\text{H}_{128}\text{O}_8\text{Si}_{14}$ : C, 60.81; H, 7.78. Found: C, 60.47; H, 7.91.

**6-8-6 tricyclic laddersiloxane (12):**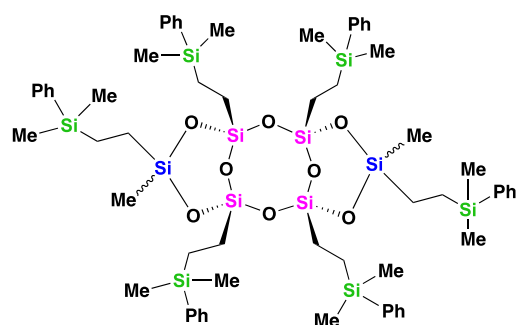

$^1\text{H}$  NMR (600.17 MHz,  $\text{CDCl}_3$ ):  $\delta$  = 0.10–0.26 (m, 42H), 0.54–0.78 (m, 24H), 7.31–7.34 (m, 18H), 7.46–7.49 (m, 12H) ppm.

$^{29}\text{Si}$  NMR (119.24 MHz,  $\text{CDCl}_3$ ):  $\delta$  = −1.10, −1.14, −6.19, −6.36, −6.82, −54.95, −54.99, −55.31, −55.39 ppm.

$^{13}\text{C}$  NMR (150.91 MHz,  $\text{CDCl}_3$ ):  $\delta$  = −3.51, −3.48, −3.26, −1.64, −1.49, −1.08, 4.93, 4.99, 6.56, 6.68, 6.81, 6.95, 7.27, 8.83, 9.01, 9.41, 127.70, 127.84, 127.90, 128.87, 128.92, 128.96, 129.01, 133.70, 133.78, 133.86, 133.96, 138.96, 139.02, 139.08, 139.24, 139.44 ppm.

MALDI-TOF MS ( $m/z$ ): 1327.16 ( $[\text{M}+\text{Na}]^+$ , calcd 1327.42), 1345.17 ( $[\text{M}+\text{K}]^+$ , calcd 1345.40).

Elemental analysis: Calcd for  $\text{C}_{62}\text{H}_{96}\text{O}_8\text{Si}_{12}\cdot 2\text{H}_2\text{O}$ : C, 55.47; H, 7.51. Found: C, 55.49; H, 7.51.

**6-8-6 tricyclic laddersiloxane (13):**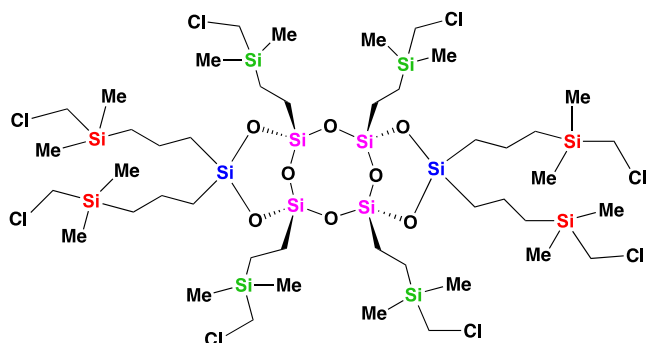

$^1\text{H}$  NMR (600.17 MHz,  $\text{CDCl}_3$ ):  $\delta$  = 0.095–0.11 (m, 48H), 0.60–0.79 (m, 32H), 1.43–1.49 (m, 8H), 2.770 (s, 4H), 2.774 (s, 4H), 2.79 (s, 8H) ppm.

$^{29}\text{Si}$  NMR (119.24 MHz,  $\text{CDCl}_3$ ):  $\delta$  = 5.37, 2.99, 2.93, −8.58, −55.58 ppm.

$^{13}\text{C}$  NMR (150.91 MHz,  $\text{CDCl}_3$ ):  $\delta$  = −4.96, −4.39, −4.32, 4.76, 4.94, 17.06, 17.18, 17.96, 18.12, 20.39, 20.49, 29.94, 30.44 ppm.

MALDI-TOF MS ( $m/z$ ): 1460.86 ( $[\text{M}+\text{Na}]^+$ , calcd 1460.18).

Elemental analysis: Calcd for  $\text{C}_{44}\text{H}_{104}\text{Cl}_8\text{O}_8\text{Si}_{14}\cdot\text{H}_2\text{O}$ : C, 36.29; H, 7.34. Found: C, 34.94; H, 7.30.

**6-8-6 tricyclic laddersiloxane (14):**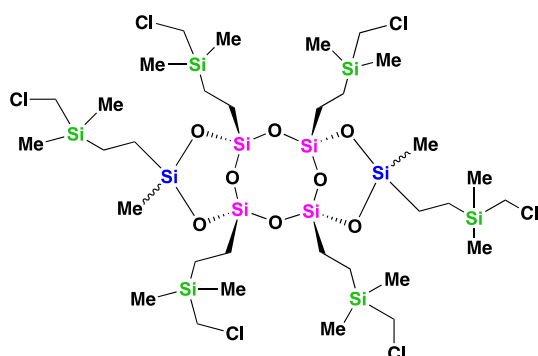

$^1\text{H}$  NMR (600.17 MHz,  $\text{CDCl}_3$ ):  $\delta$  = 0.10–0.25 (m, 42H), 0.59–0.70 (m, 24H), 2.78–2.79 (m, 12H) ppm.

$^{29}\text{Si}$  NMR (119.24 MHz,  $\text{CDCl}_3$ ):  $\delta$  = 5.61, 5.40, 5.20, −6.17, −6.57, −6.92, −55.12, −55.22, −55.58 ppm.

$^{13}\text{C}$  NMR (150.91 MHz,  $\text{CDCl}_3$ ):  $\delta$  = −5.00, −4.80, −4.30, −1.67, −1.55, −1.29, −0.98, 4.58, 4.63, 4.69, 4.75, 4.83, 4.86, 4.92, 8.17, 8.69, 9.07, 9.25, 29.92, 30.02, 30.10 ppm

MALDI-TOF MS ( $m/z$ ): 1162.79 ( $[\text{M}+\text{Na}]^+$ , calcd 1162.09).

Elemental analysis: Calcd for  $\text{C}_{32}\text{H}_{78}\text{Cl}_6\text{O}_8\text{Si}_{12}\cdot 2\text{H}_2\text{O}$ : C, 32.66; H, 7.02. Found: C, 32.49; H, 6.98.

**2.  $^1\text{H}$ ,  $^{13}\text{C}$ ,  $^{29}\text{Si}$ ,  $^1\text{H}$ - $^1\text{H}$  COSY and  $^1\text{H}$ - $^{13}\text{C}$  HSQC NMR Spectra for synthetic compounds 6-15**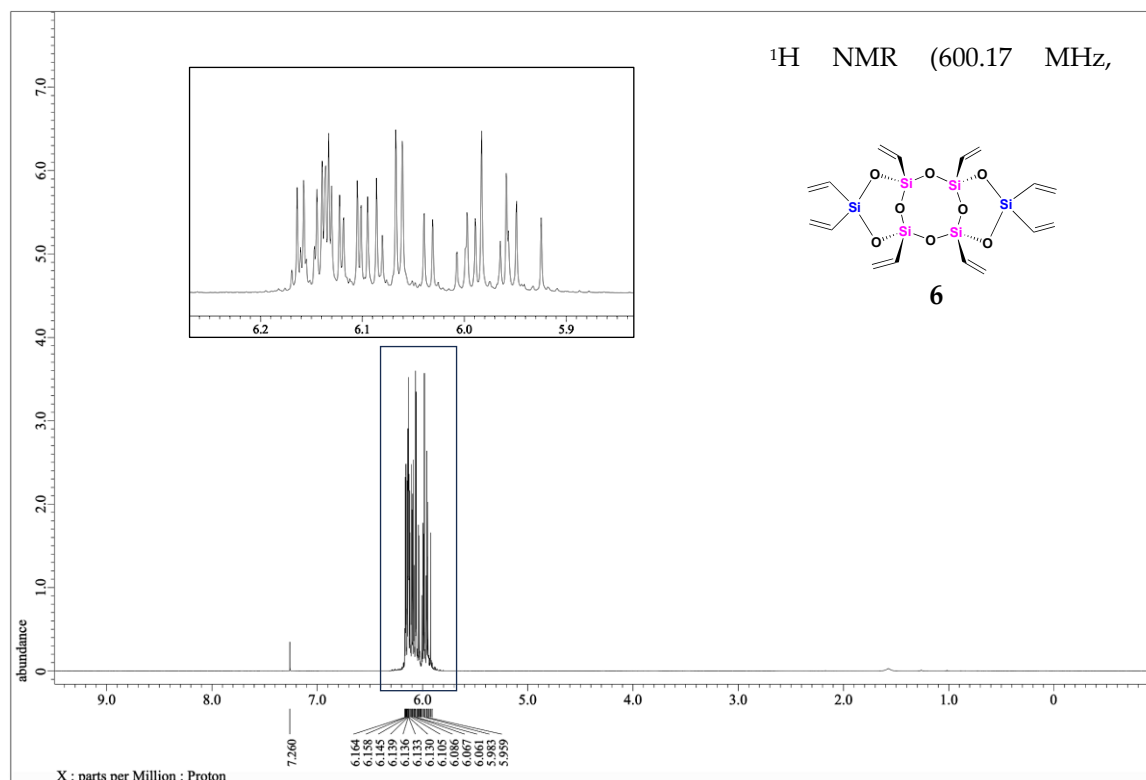**Figure S1.**  $^1\text{H}$  NMR spectrum for 6.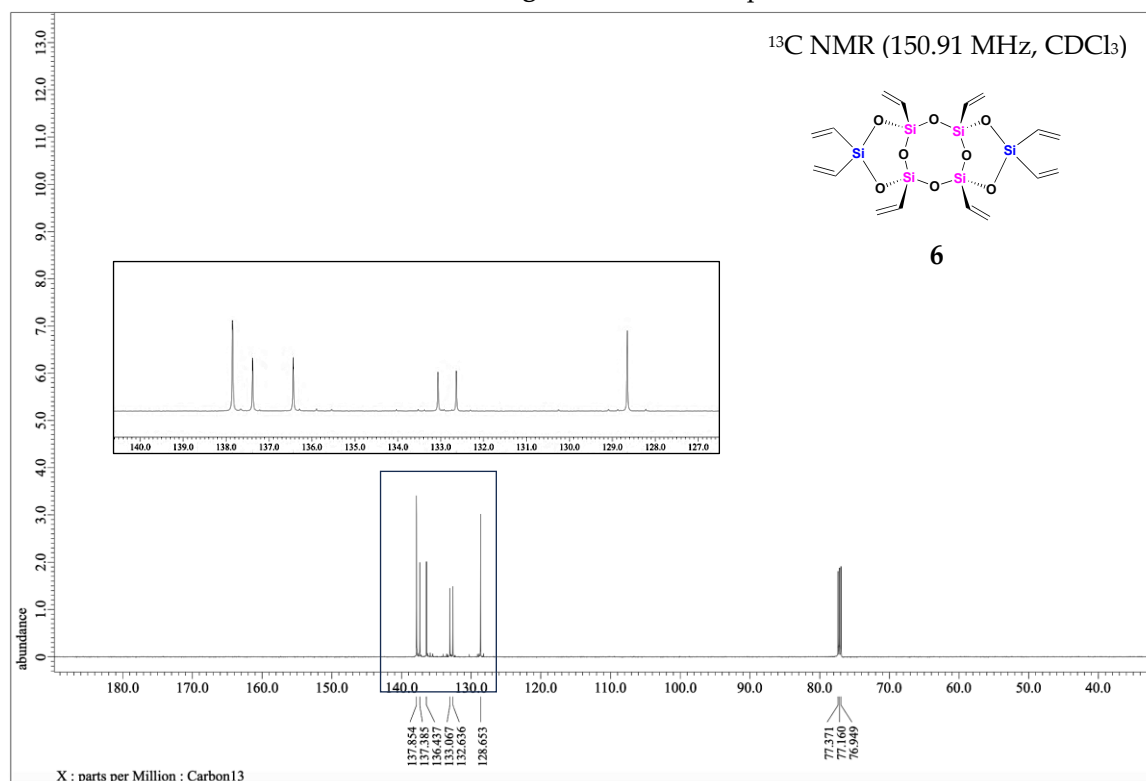**Figure S2.**  $^{13}\text{C}$  NMR spectrum for 6.

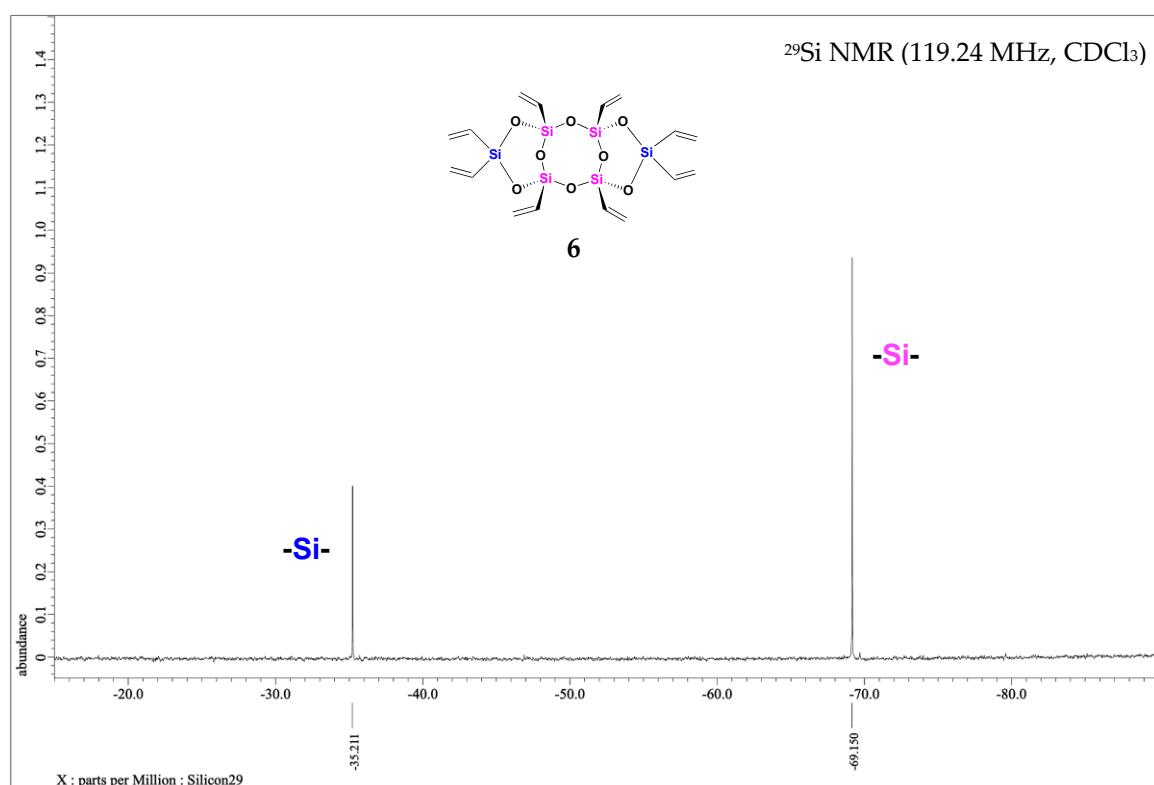Figure S3. <sup>29</sup>Si NMR spectrum for 6.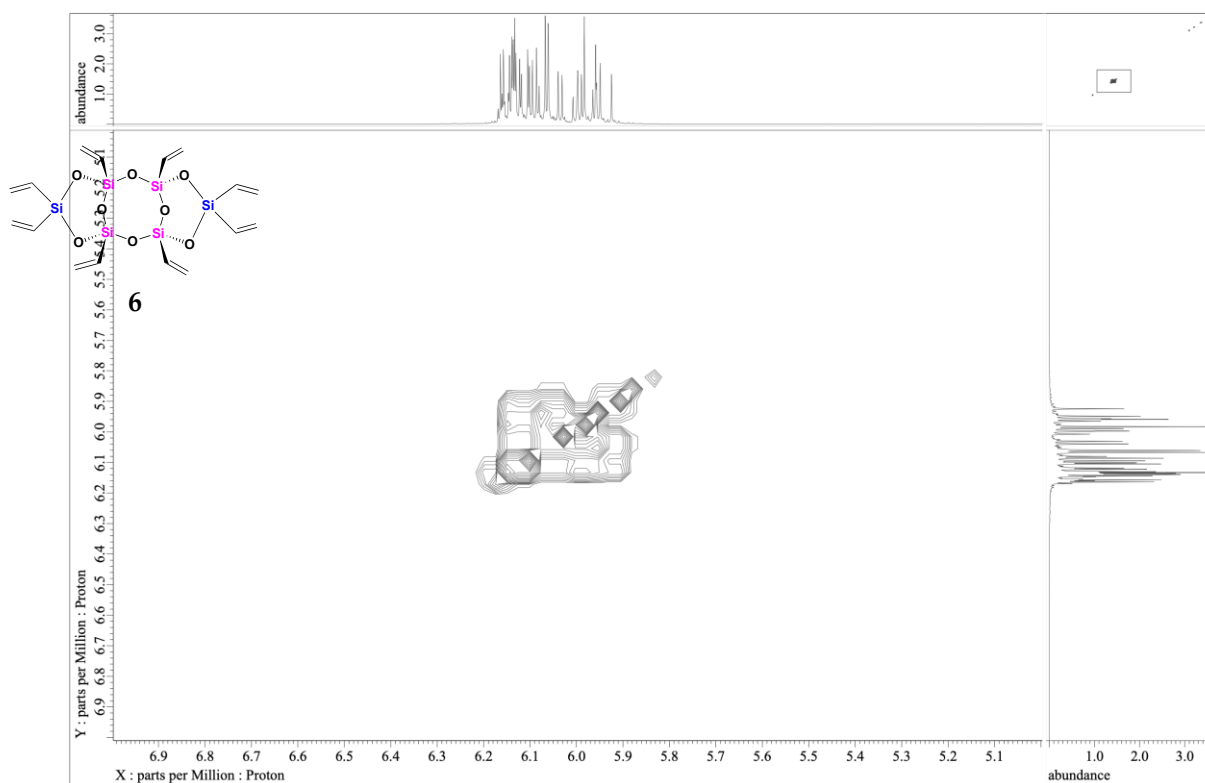Figure S4. <sup>1</sup>H-<sup>1</sup>H COSY NMR spectrum for 6.

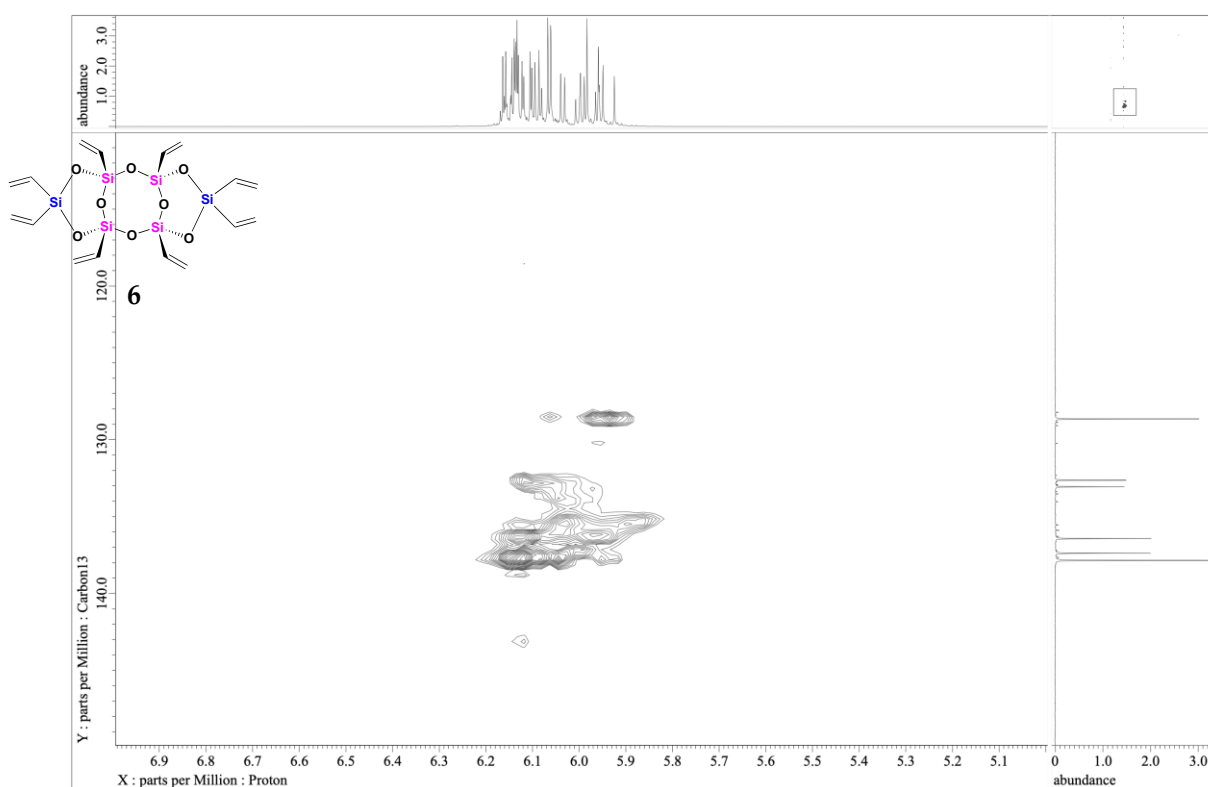Figure S5.  $^1\text{H}$ - $^{13}\text{C}$  HSQC NMR spectrum for 6.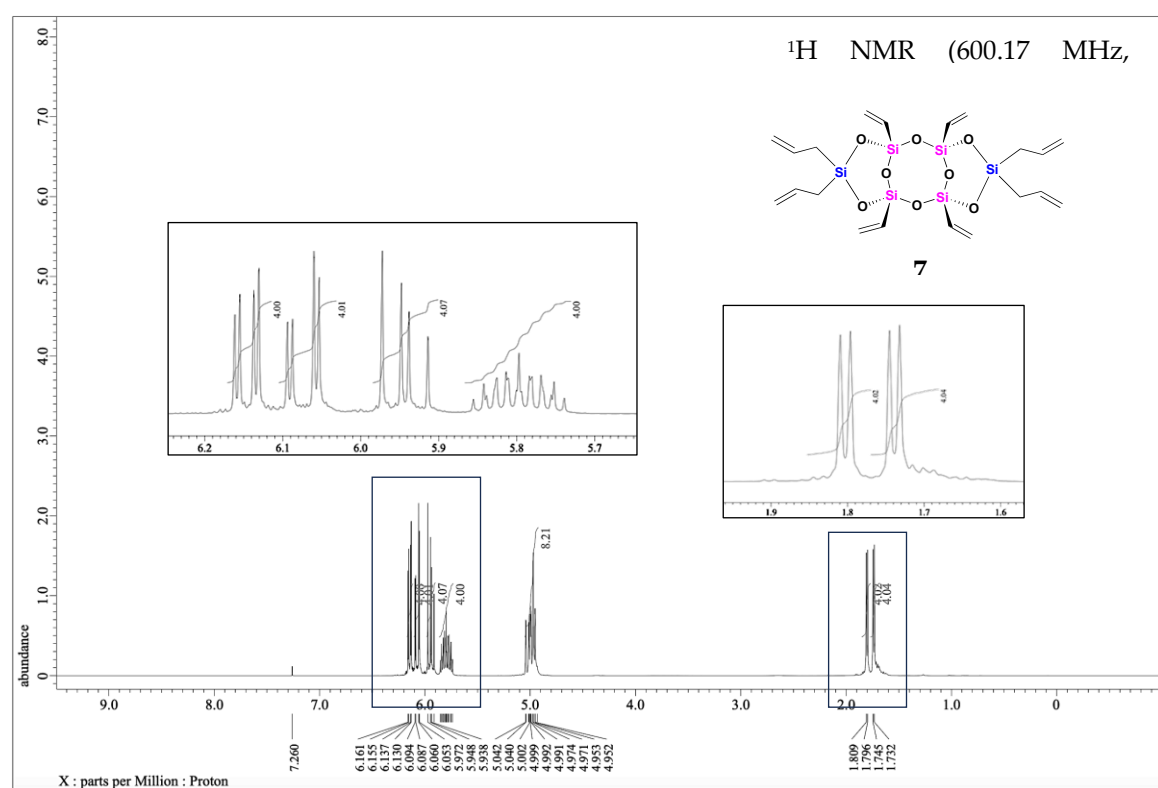Figure S6.  $^1\text{H}$  NMR spectrum for 7.



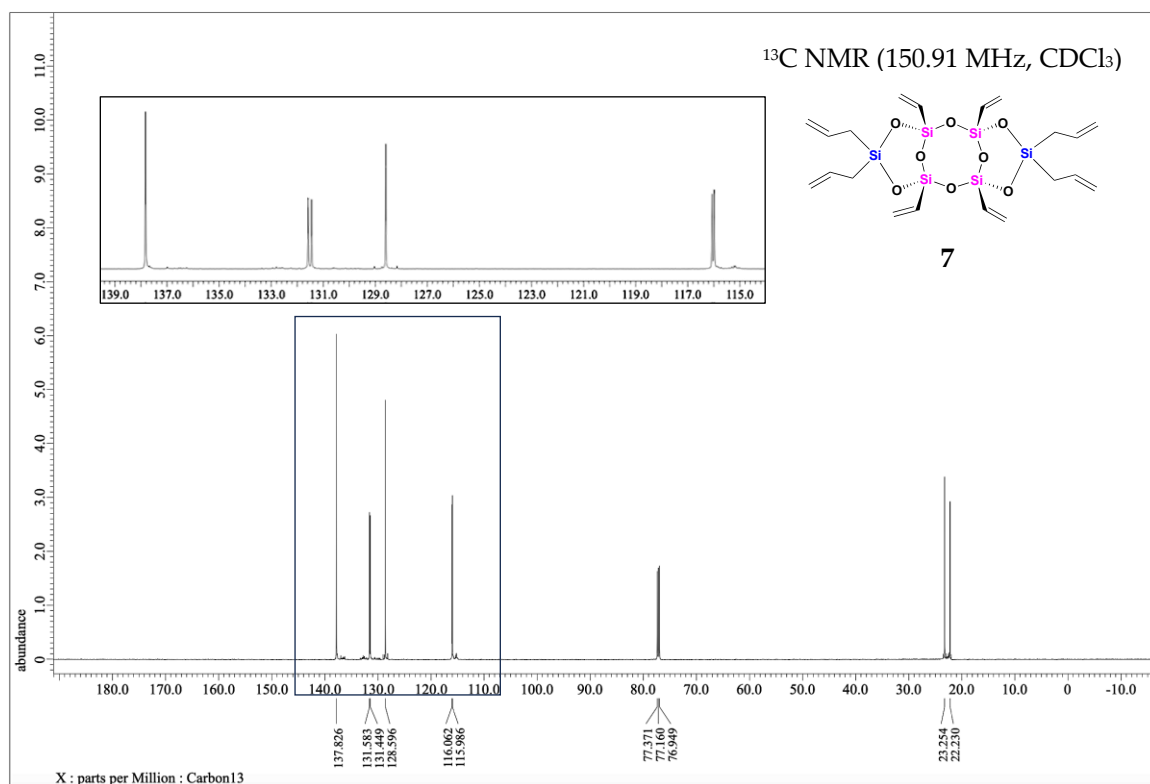Figure S7.  $^{13}\text{C}$  NMR spectrum for 7.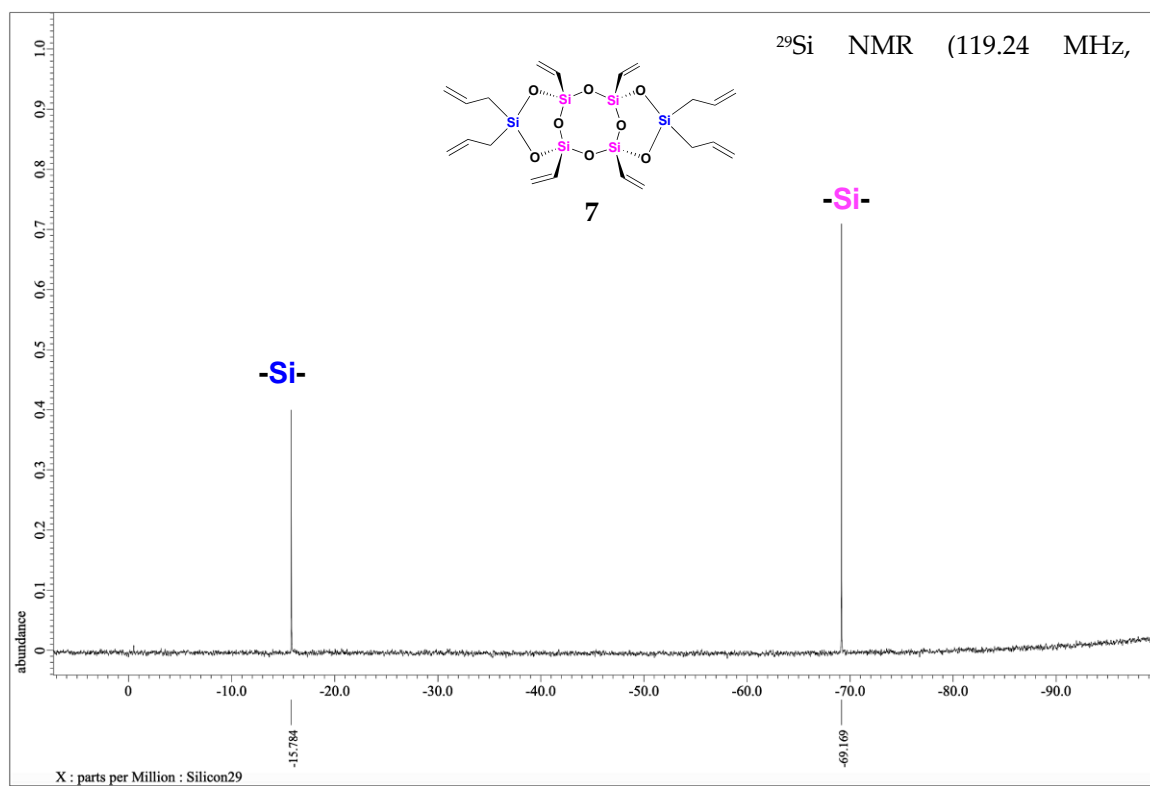Figure S8.  $^{29}\text{Si}$  NMR spectrum for 7.

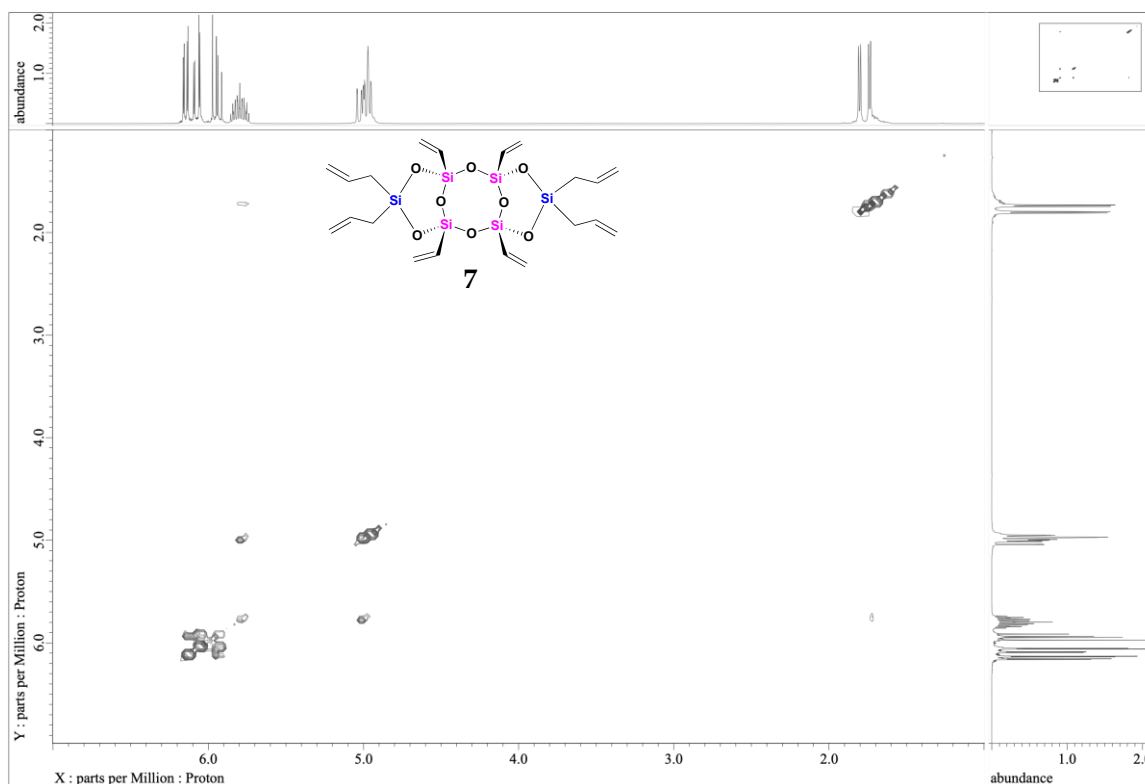Figure S9.  $^1\text{H}$ - $^1\text{H}$  COSY NMR spectrum for 7.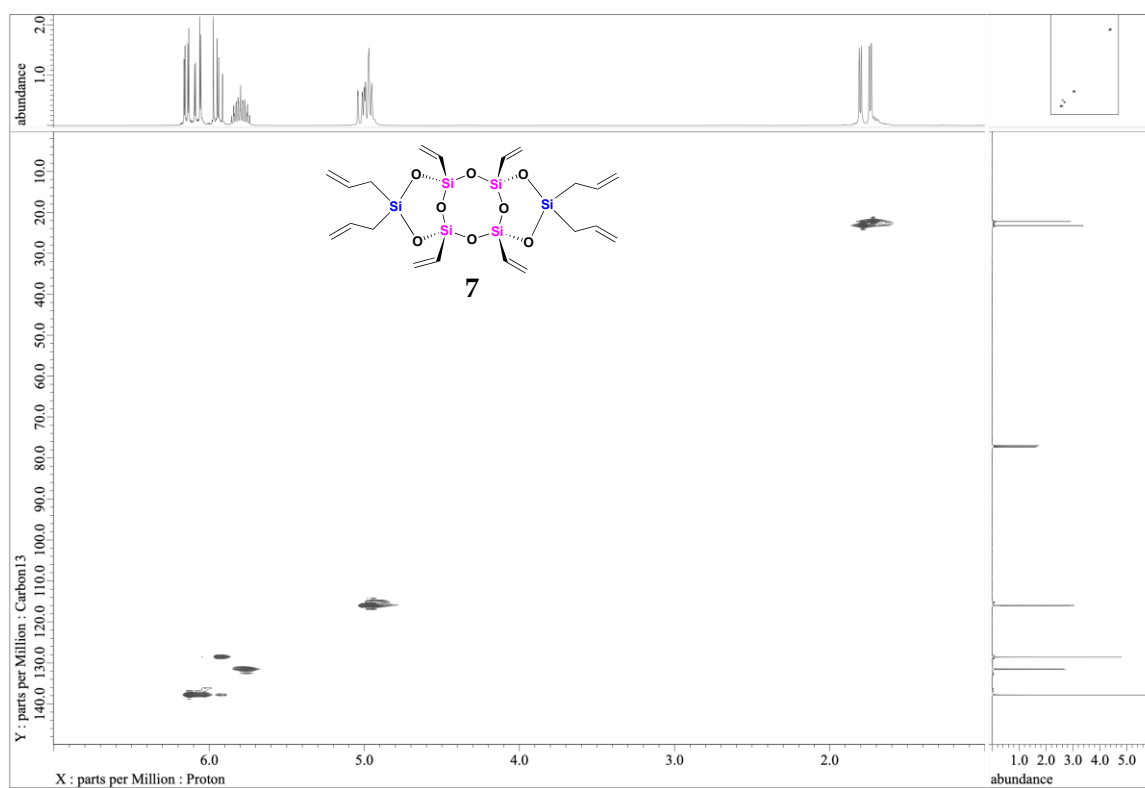Figure S10.  $^1\text{H}$ - $^{13}\text{C}$  HSQC NMR spectrum for 7.

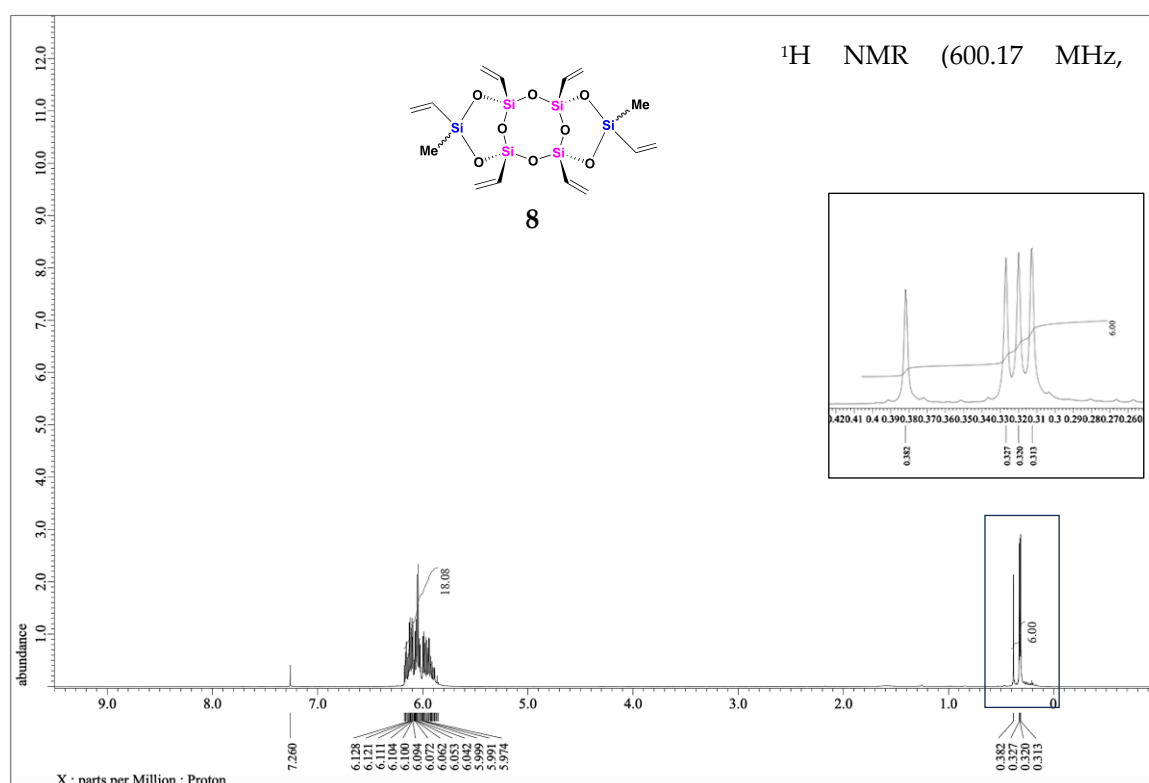Figure S11. <sup>1</sup>H NMR spectrum for 8.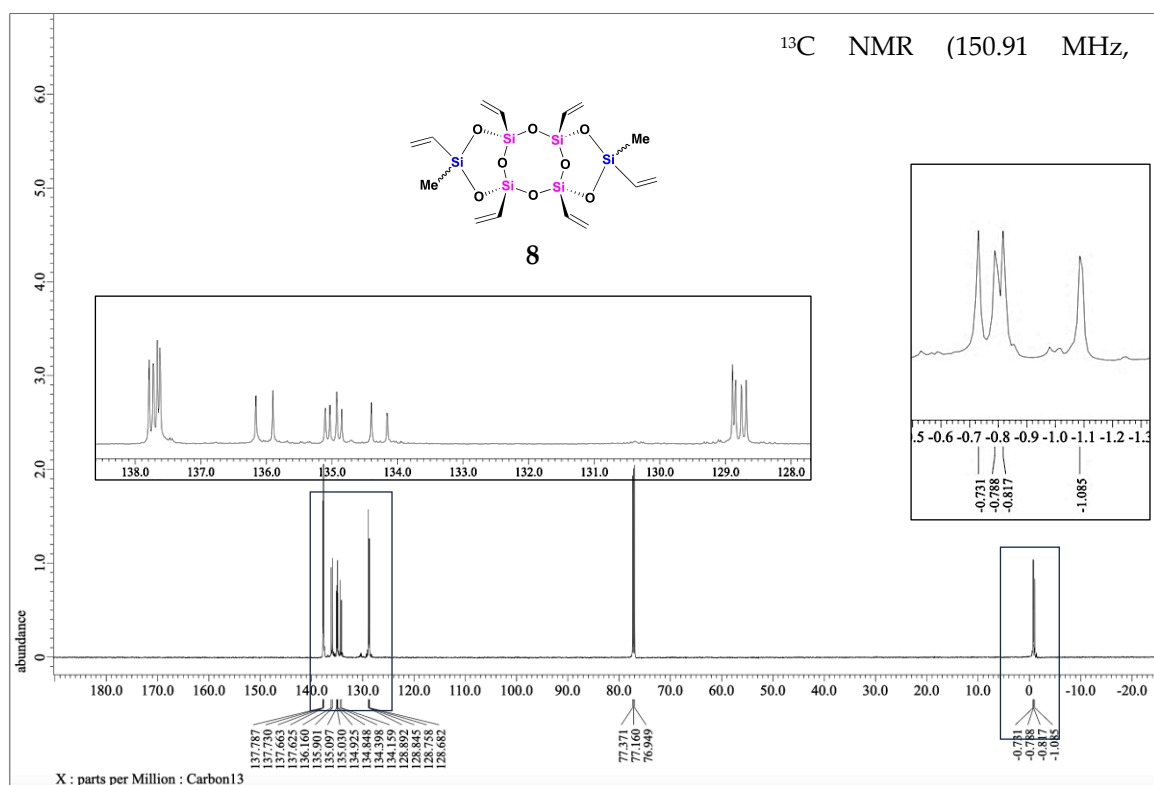Figure S12. <sup>13</sup>C NMR spectrum for 8.

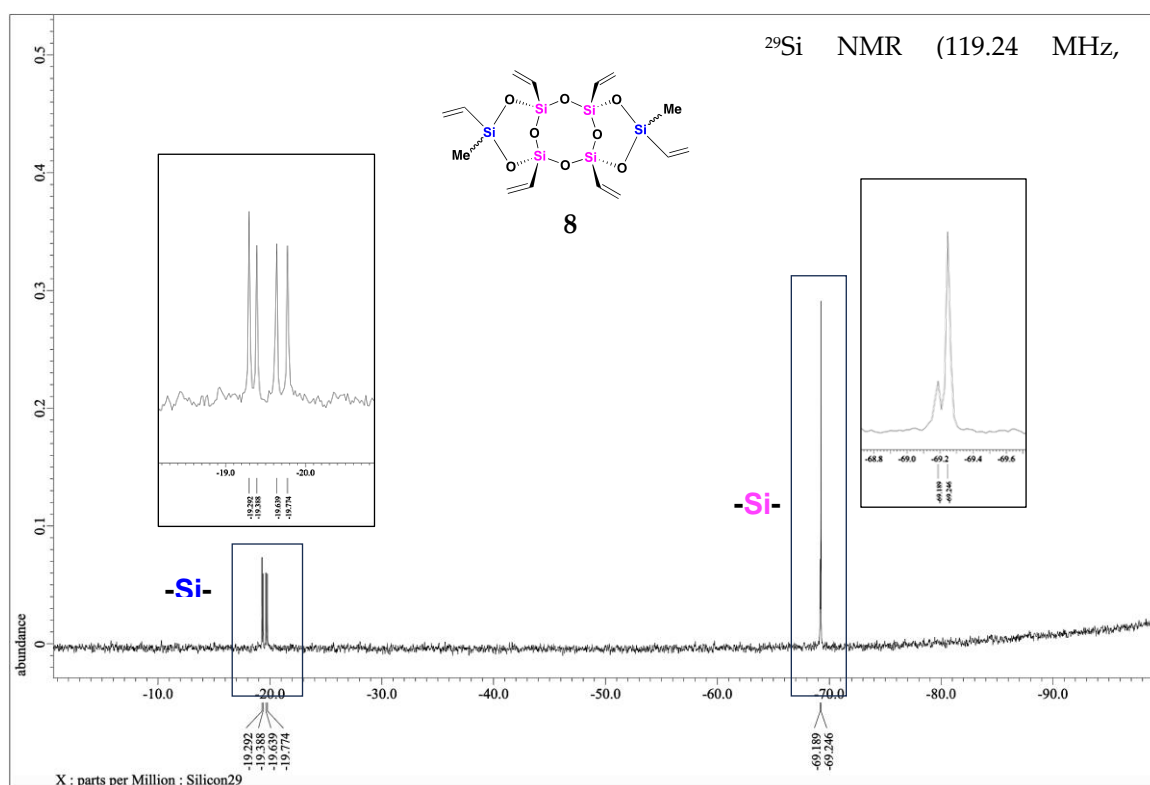Figure S13. <sup>29</sup>Si NMR spectrum for **8**.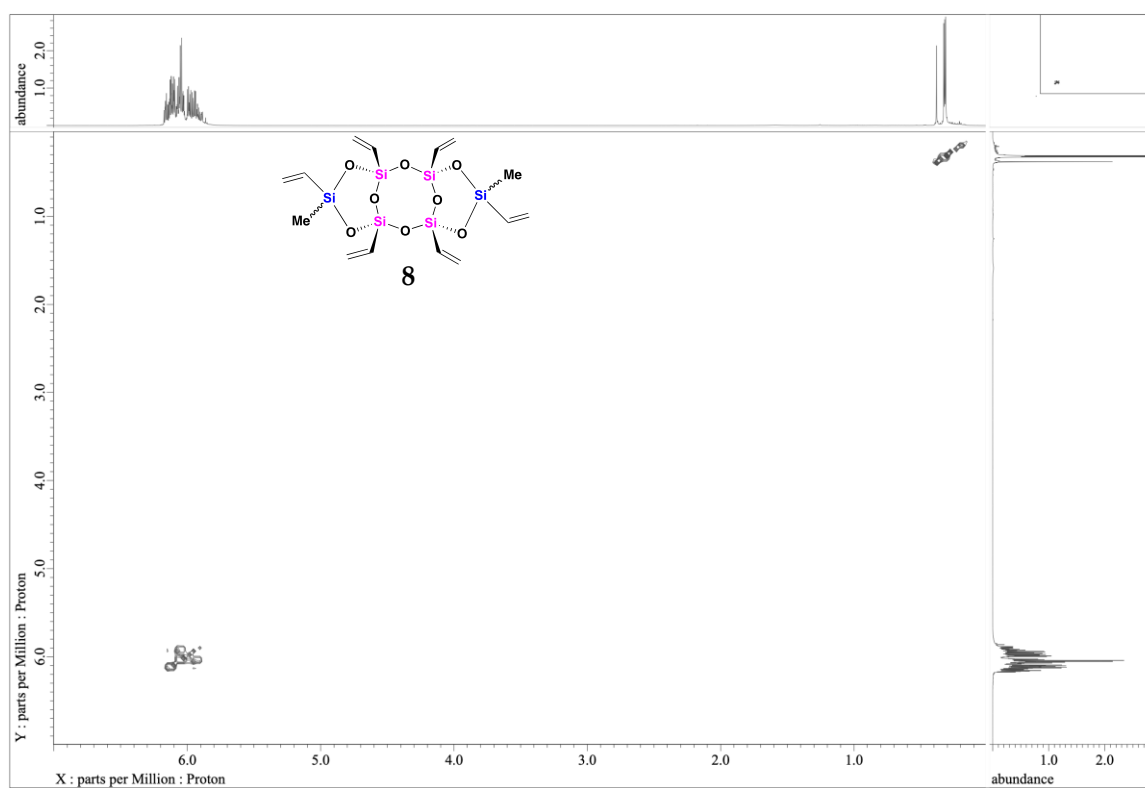Figure S14. <sup>1</sup>H-<sup>1</sup>H COSY NMR spectrum for **8**.

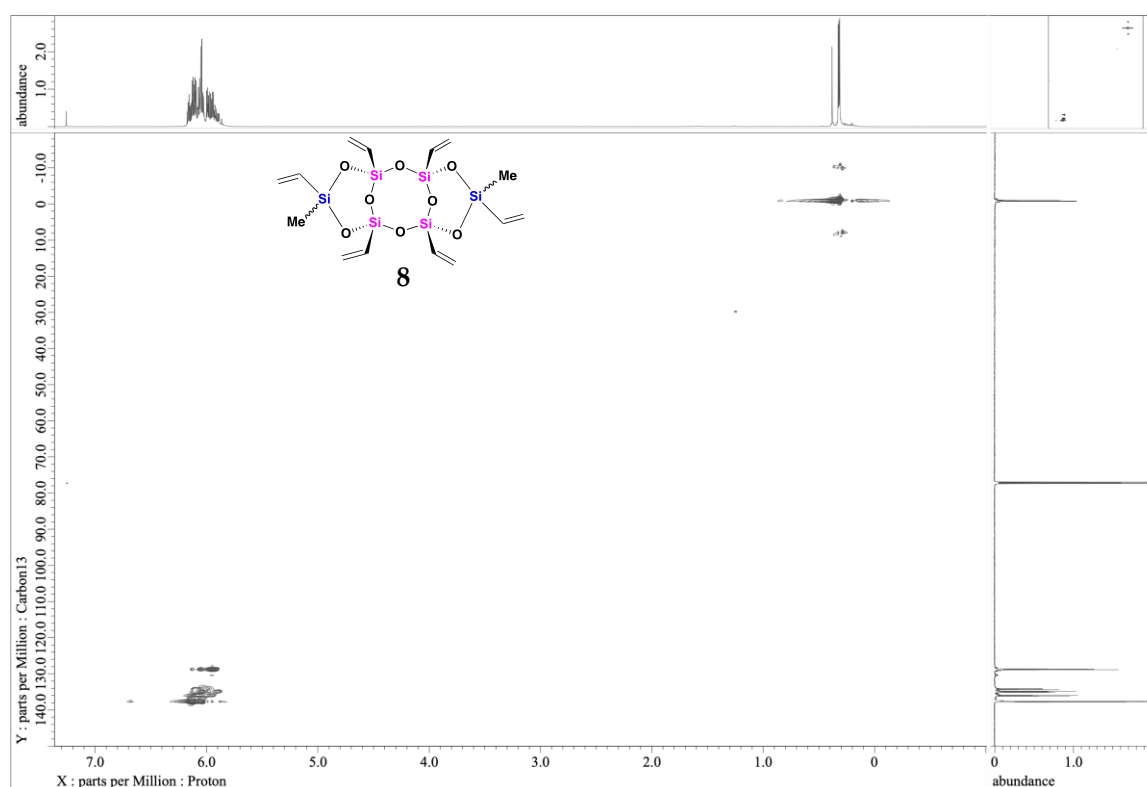**Figure S15.**  $^1\text{H}$ - $^{13}\text{C}$  HSQC NMR spectrum for **8**.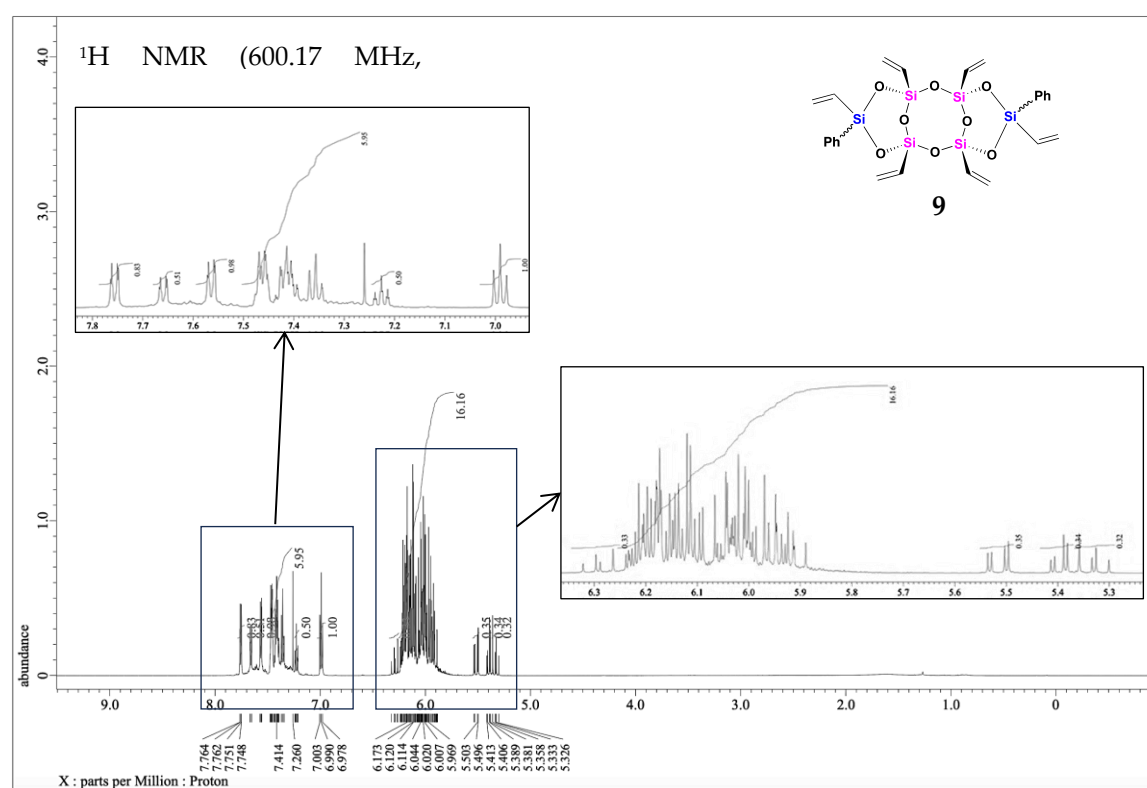**Figure S16.**  $^1\text{H}$  NMR spectrum for **9**.

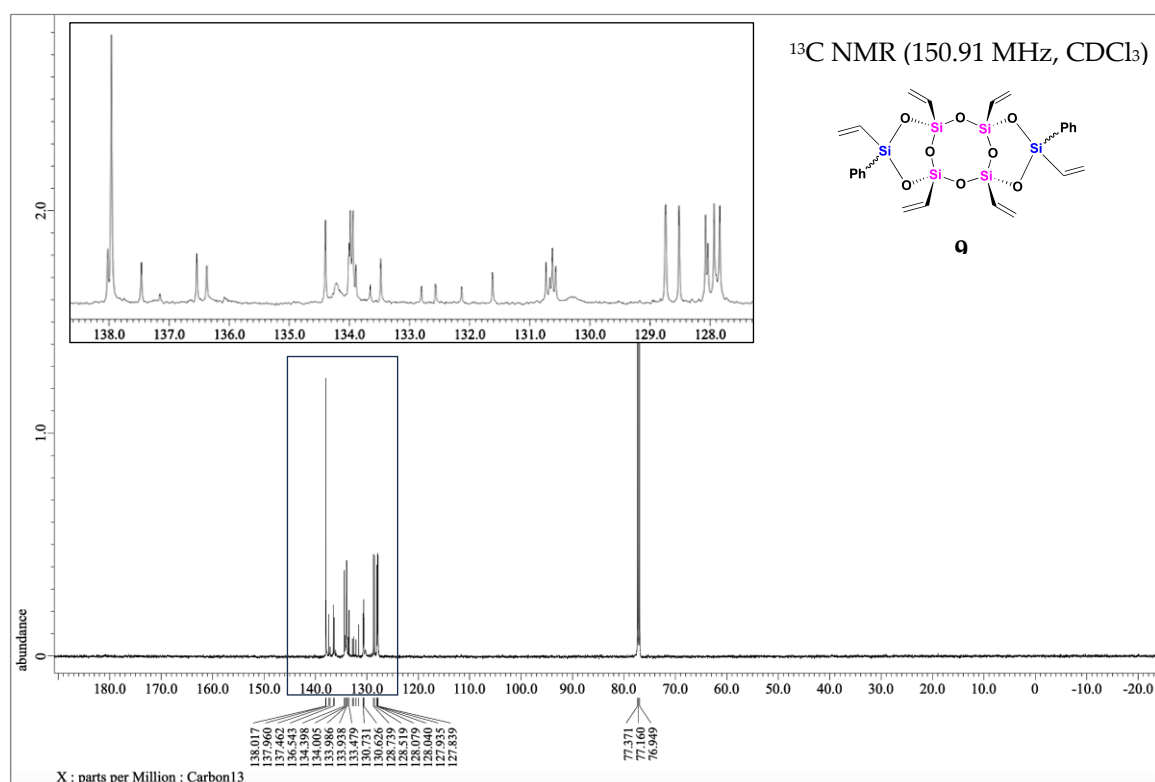Figure S17. <sup>13</sup>C NMR spectrum for **9**.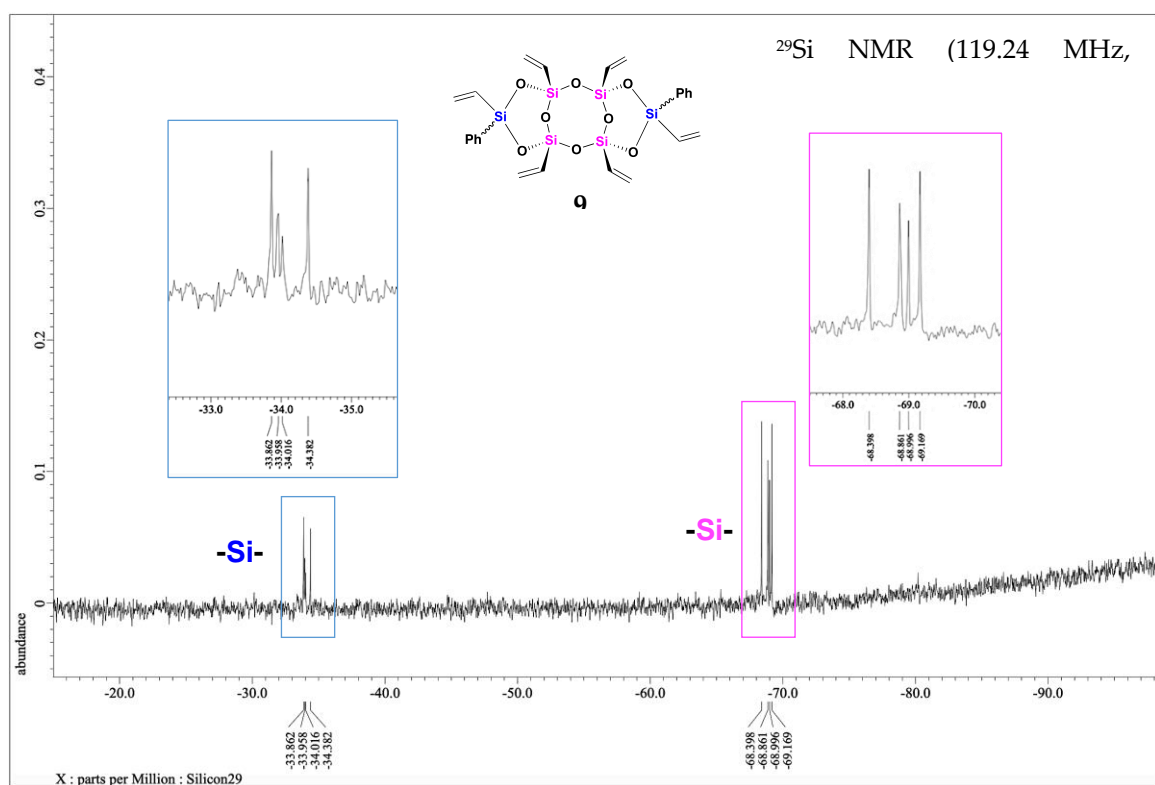Figure S18. <sup>29</sup>Si NMR spectrum for **9**.

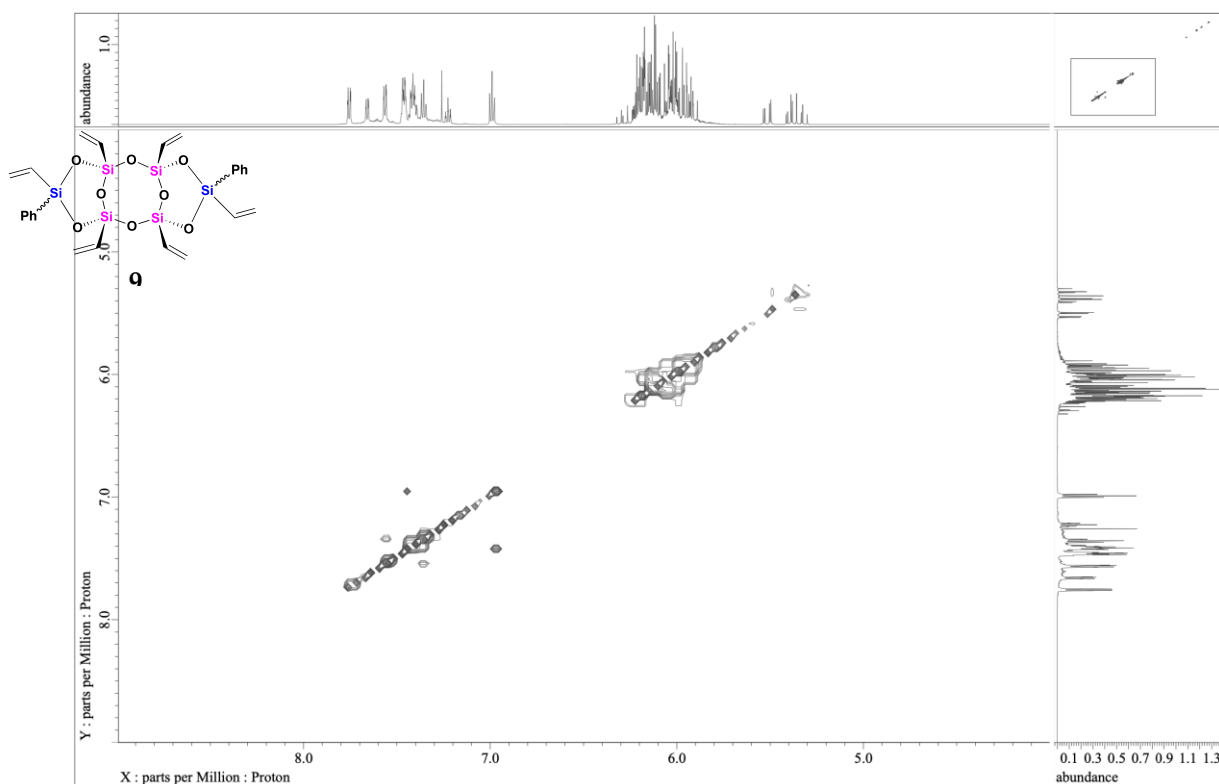Figure S19.  $^1\text{H}$ - $^1\text{H}$  COSY NMR spectrum for 9.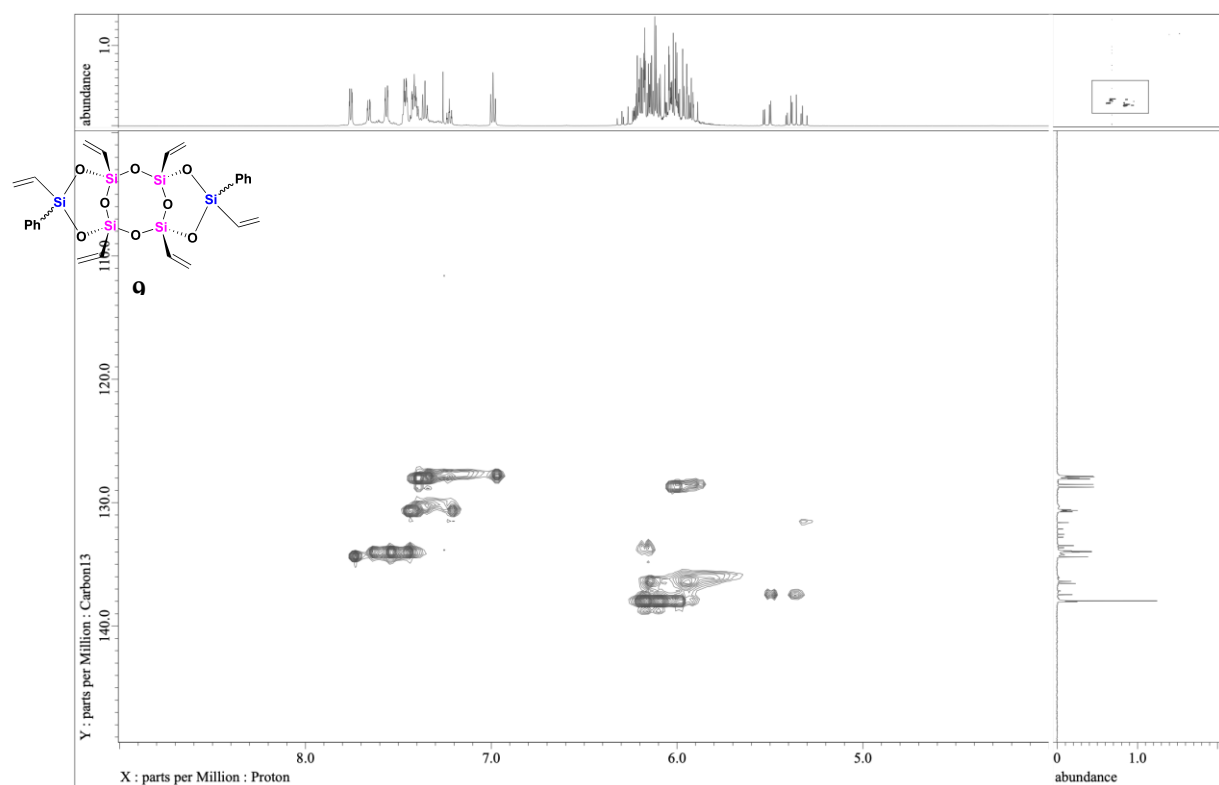Figure S20.  $^1\text{H}$ - $^{13}\text{C}$  HSQC NMR spectrum for 9.

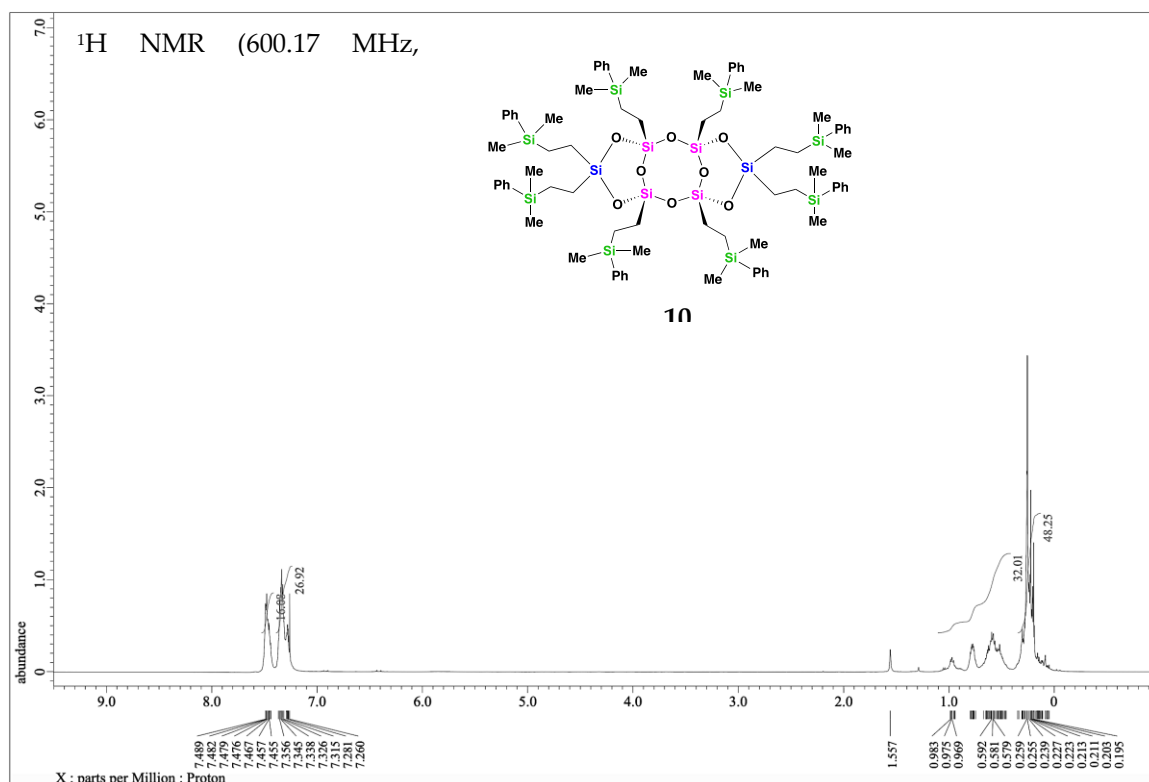Figure S21.  $^1\text{H}$  NMR spectrum for **10**.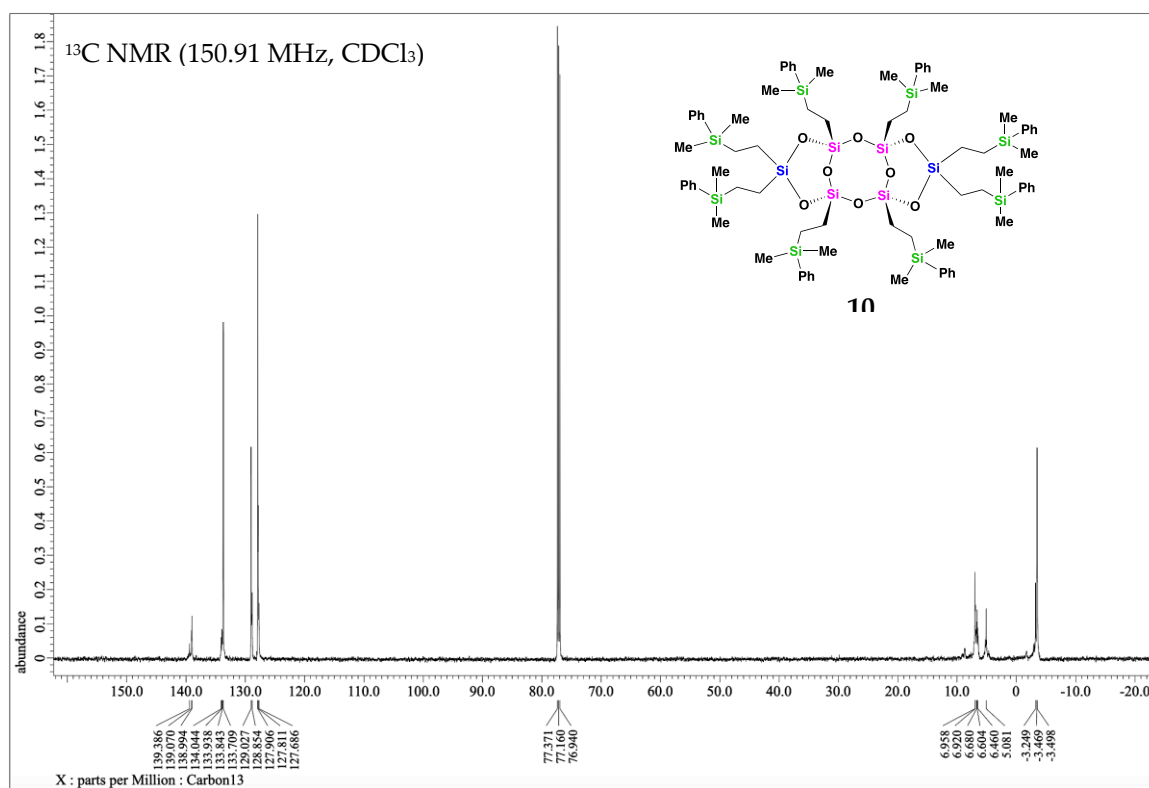Figure S22.  $^{13}\text{C}$  NMR spectrum for **10**.



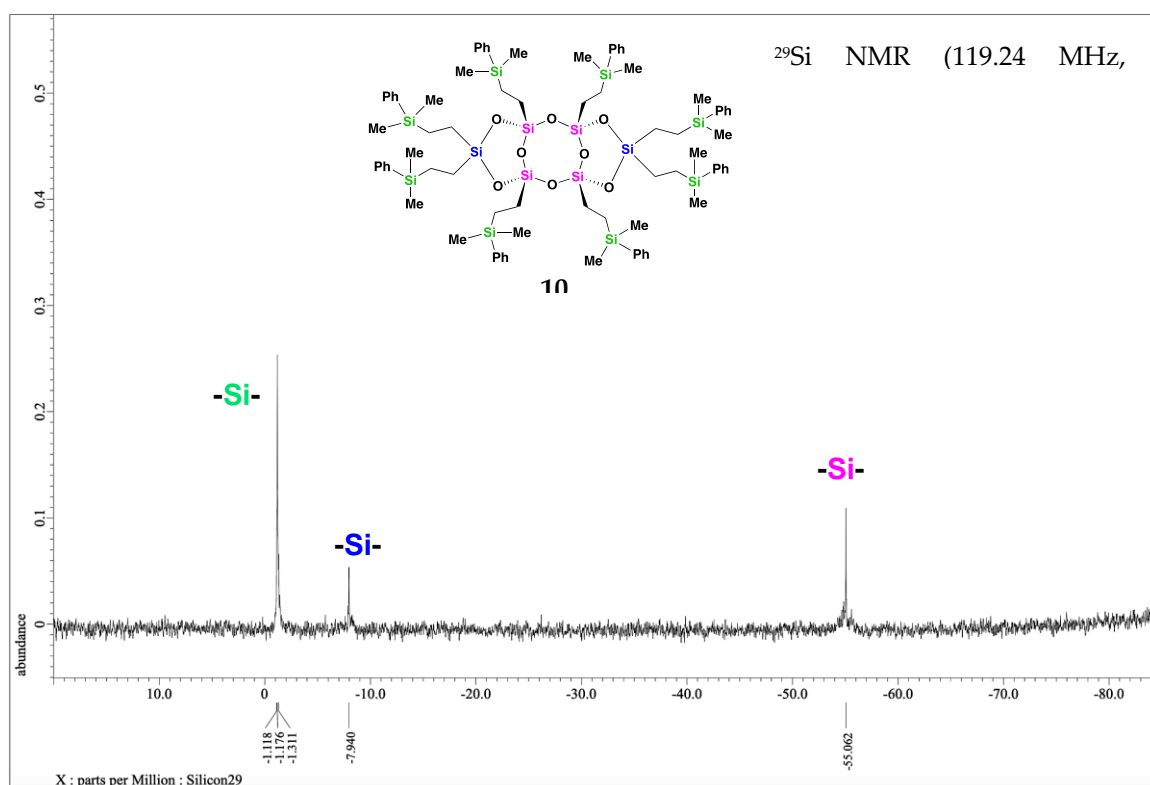Figure S23. <sup>29</sup>Si NMR spectrum for **10**.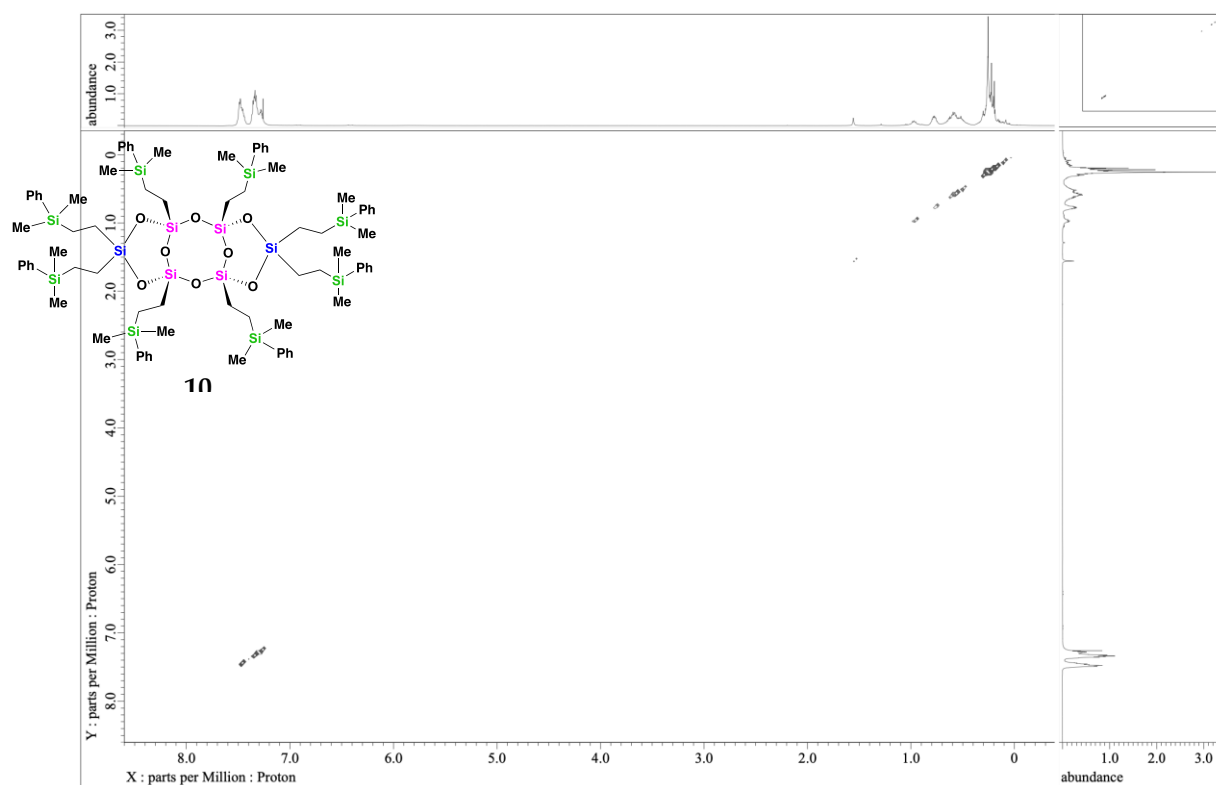Figure S24. <sup>1</sup>H-<sup>1</sup>H COSY NMR spectrum for **10**.

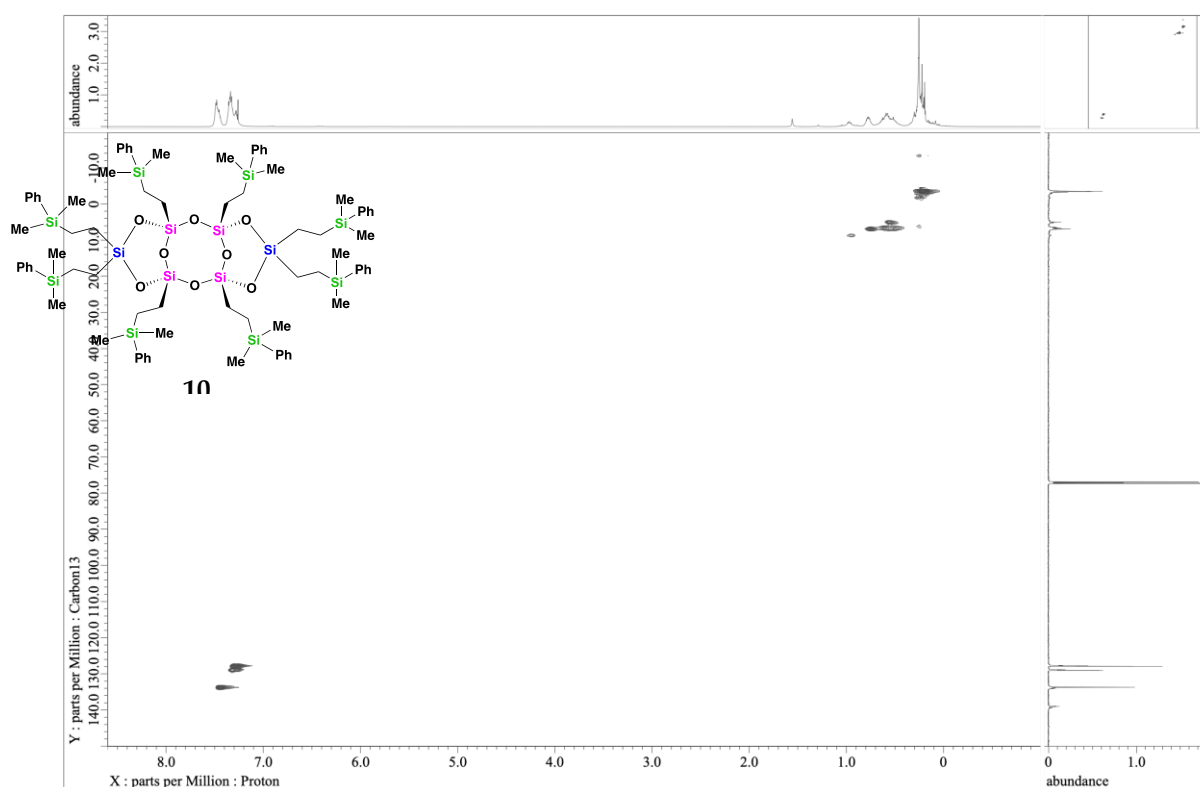Figure S25.  $^1\text{H}$ - $^{13}\text{C}$  HSQC NMR spectrum for **10**.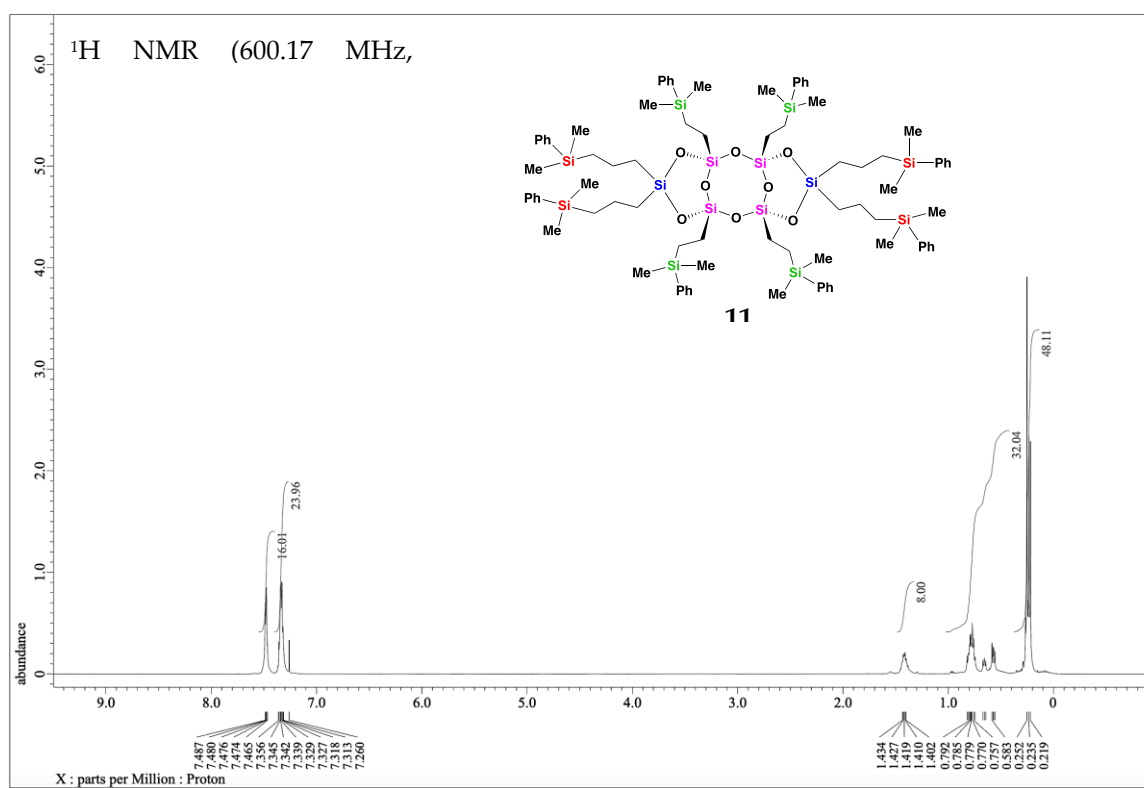Figure S26.  $^1\text{H}$  NMR spectrum for **11**.

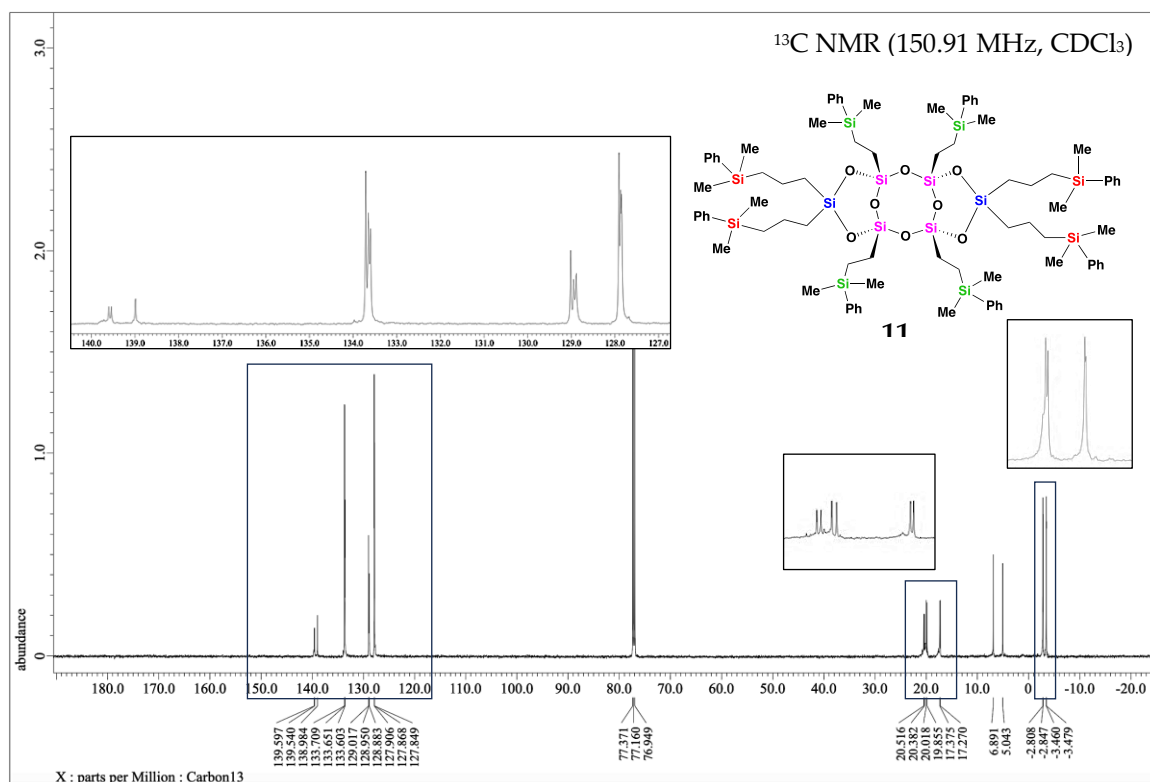Figure S27.  $^{13}\text{C}$  NMR spectrum for **11**.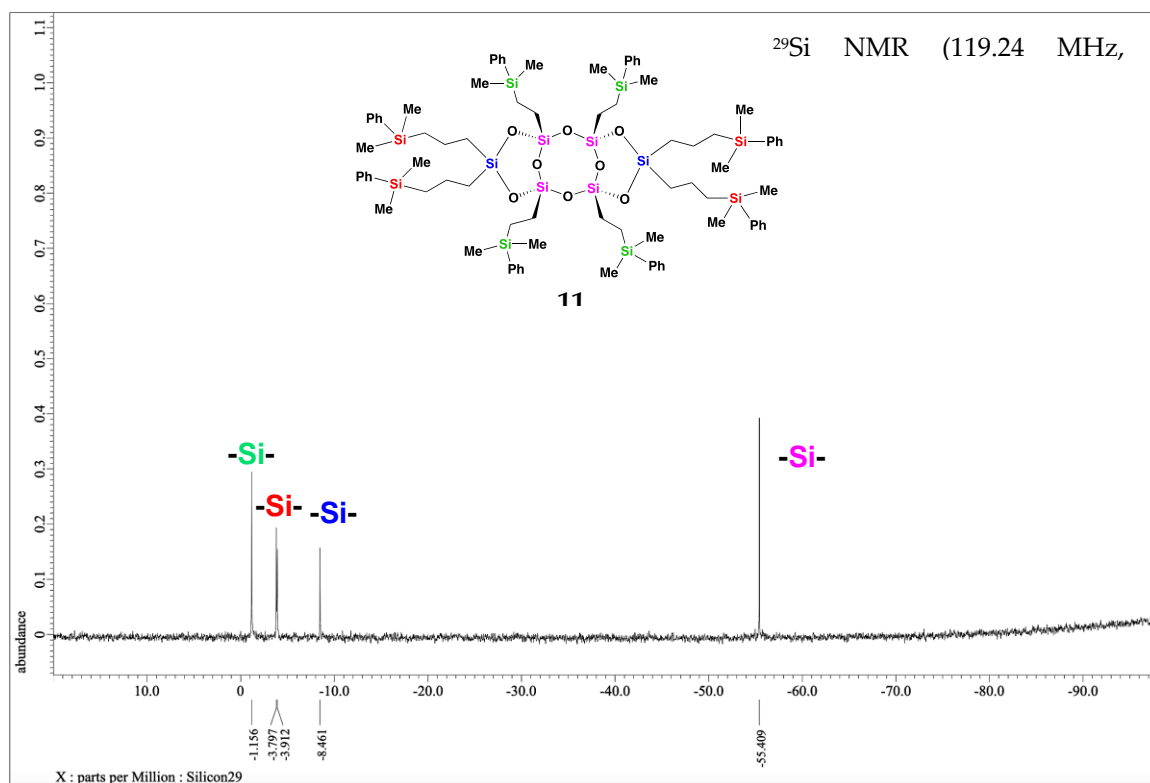Figure S28.  $^{29}\text{Si}$  NMR spectrum for **11**.

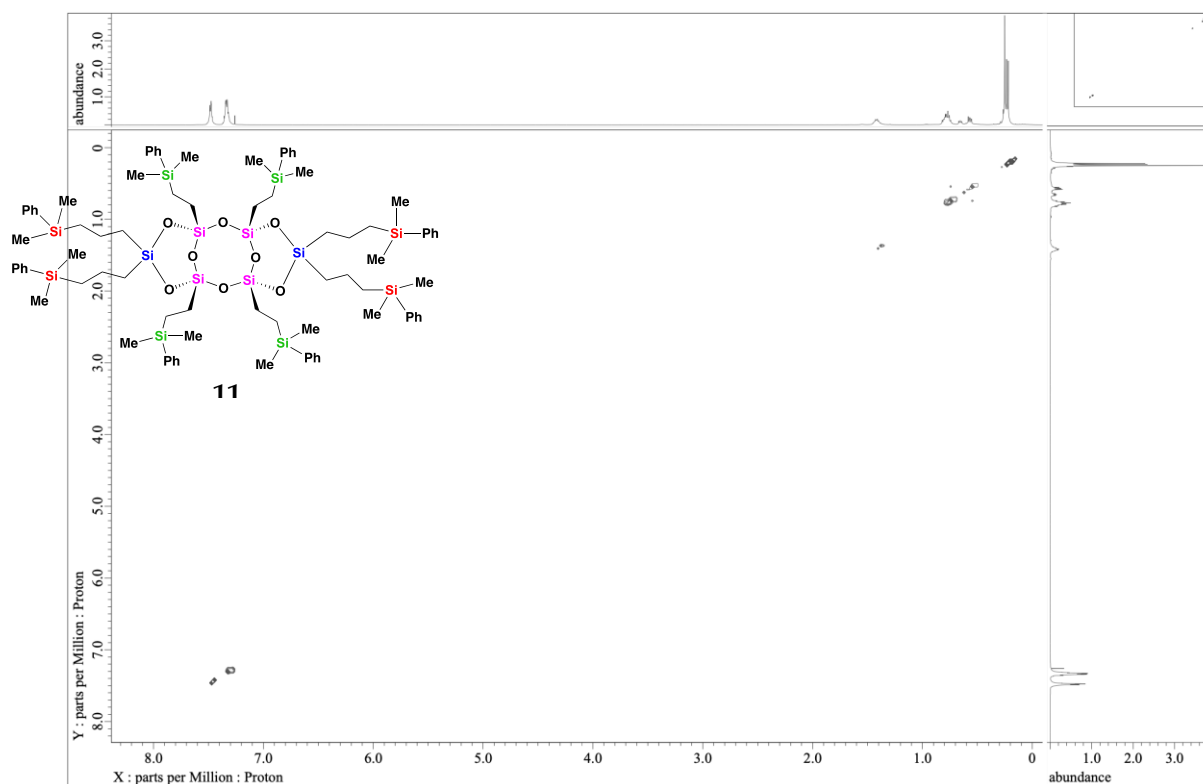Figure S29.  $^1\text{H}$ - $^1\text{H}$  COSY NMR spectrum for **11**.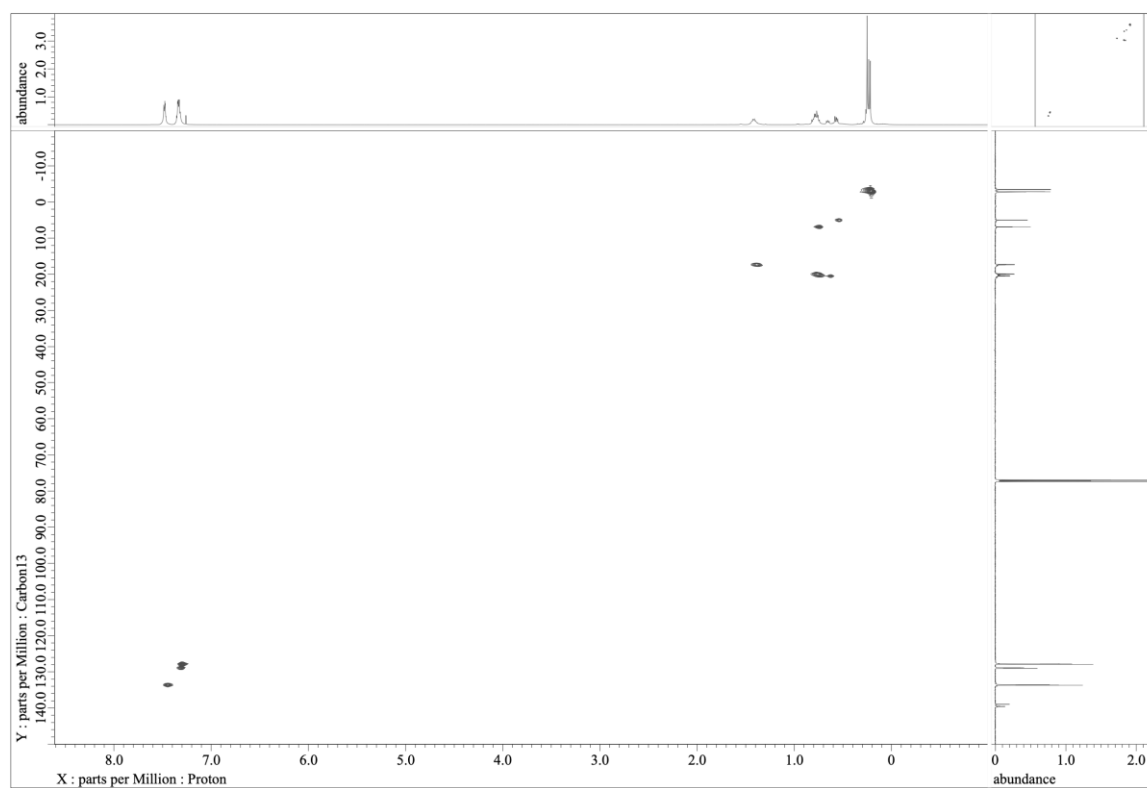Figure S30.  $^1\text{H}$ - $^{13}\text{C}$  HSQC NMR spectrum for **11**.

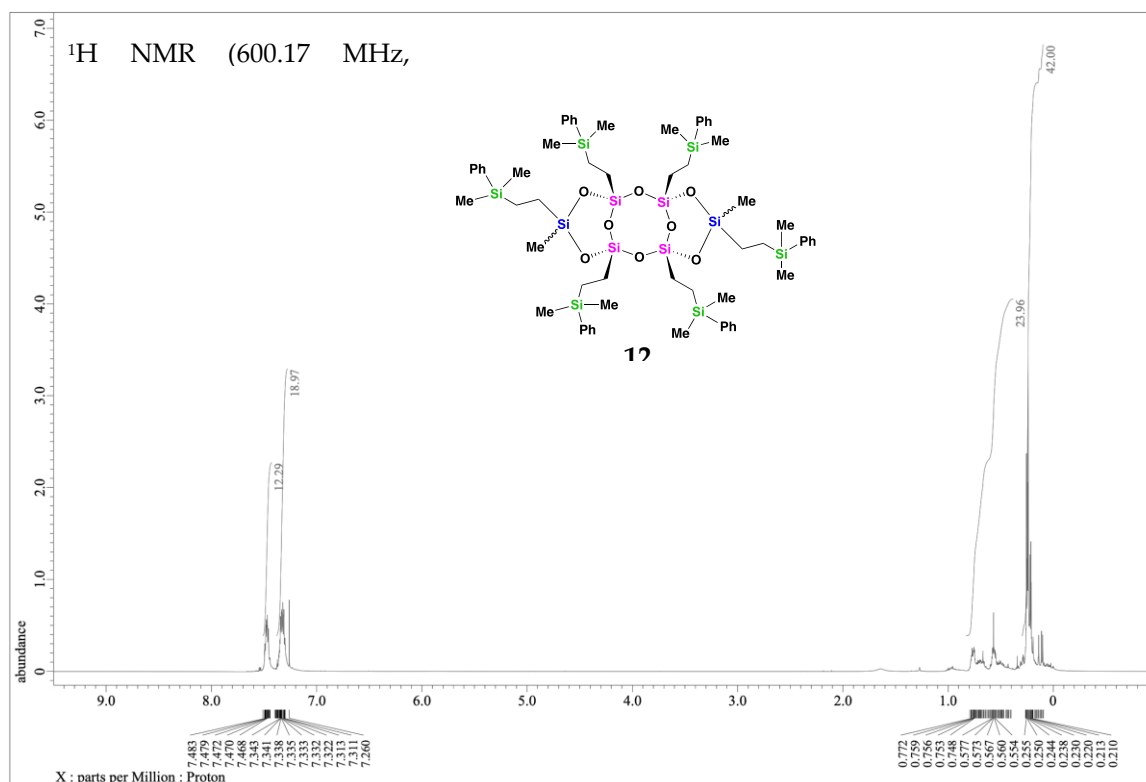Figure S31.  $^1\text{H}$  NMR spectrum for **12**.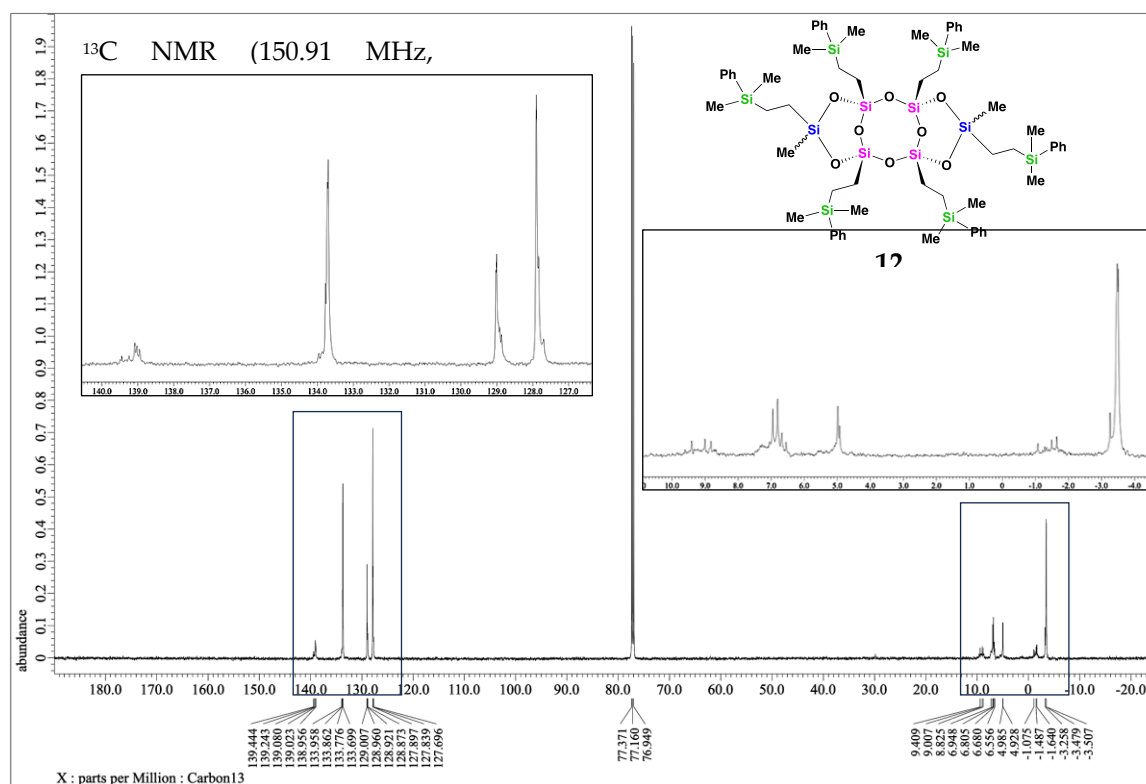Figure S32.  $^{13}\text{C}$  NMR spectrum for **12**.

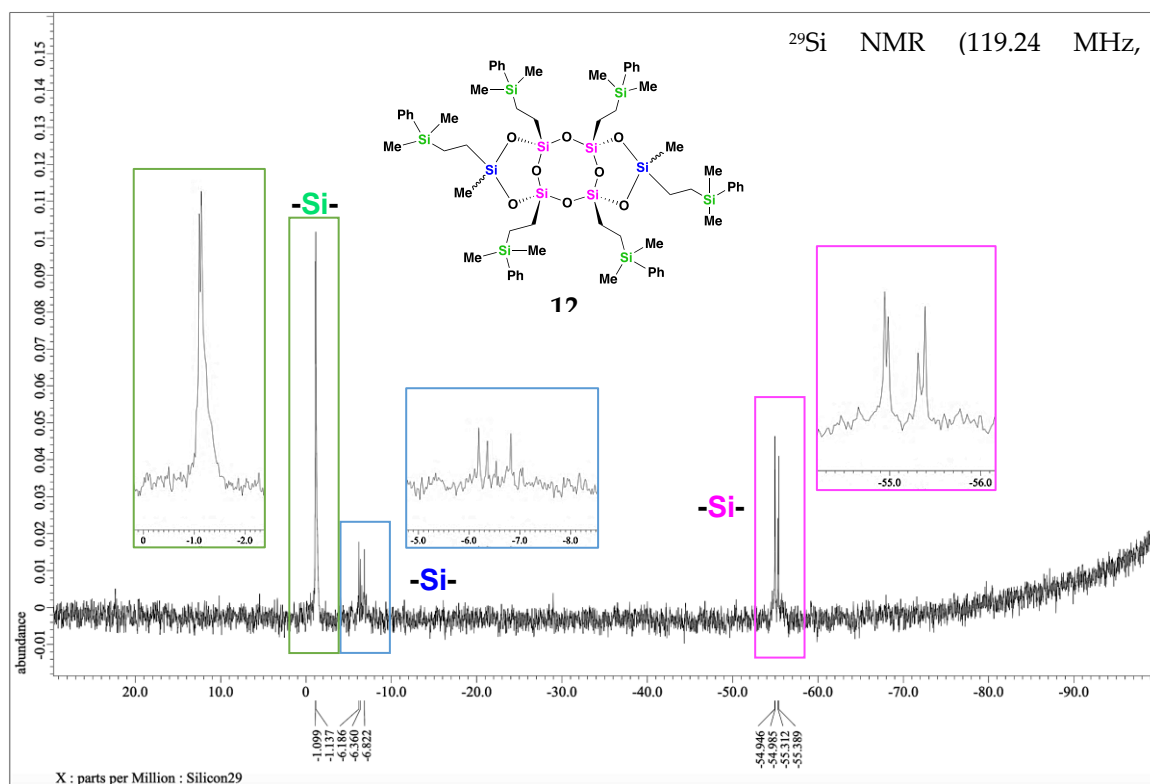Figure S33.  $^{29}\text{Si}$  NMR spectrum for 12.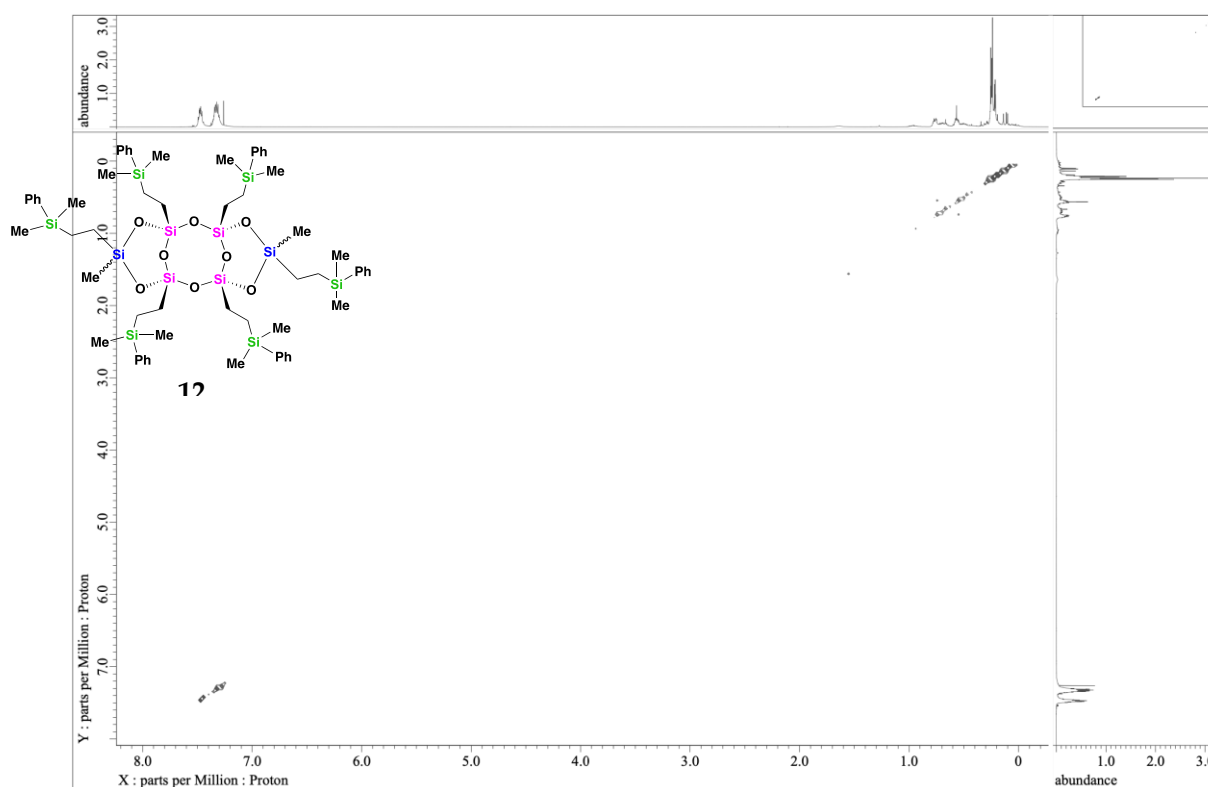Figure S34.  $^1\text{H}$ - $^1\text{H}$  COSY NMR spectrum for 12.

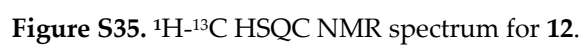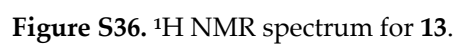

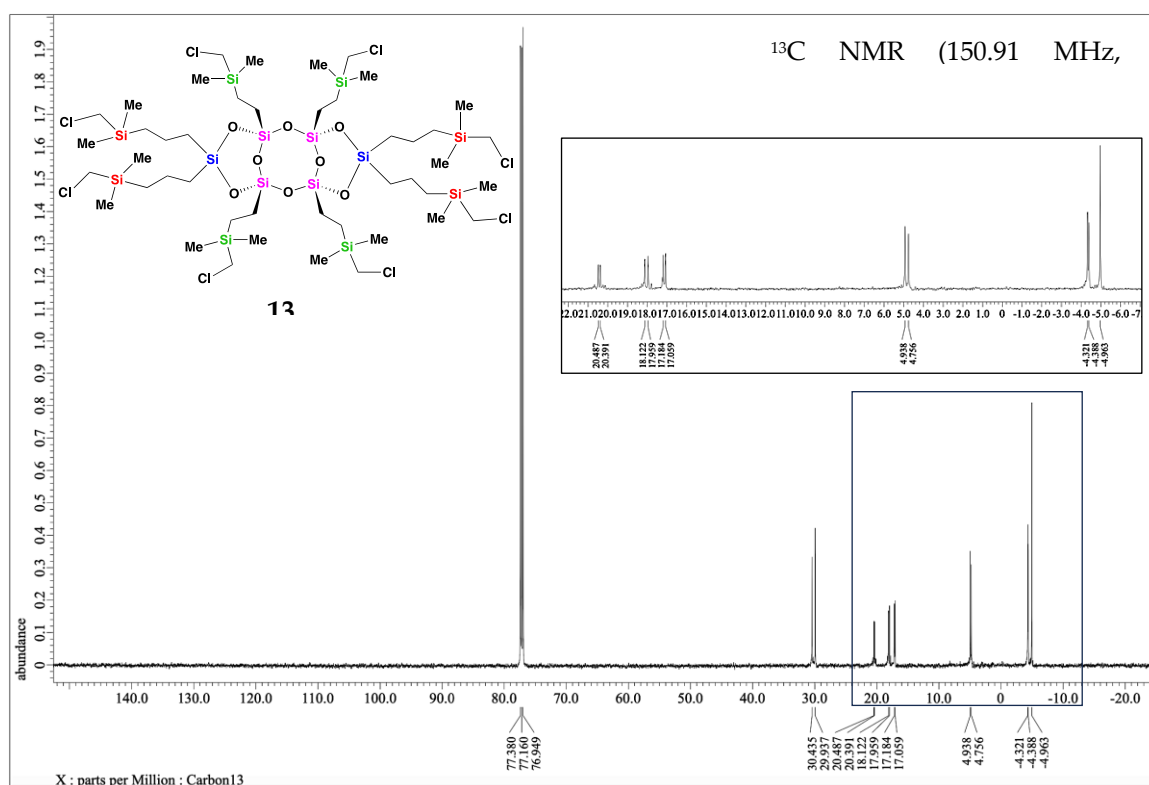Figure S37. <sup>13</sup>C NMR spectrum for **13**.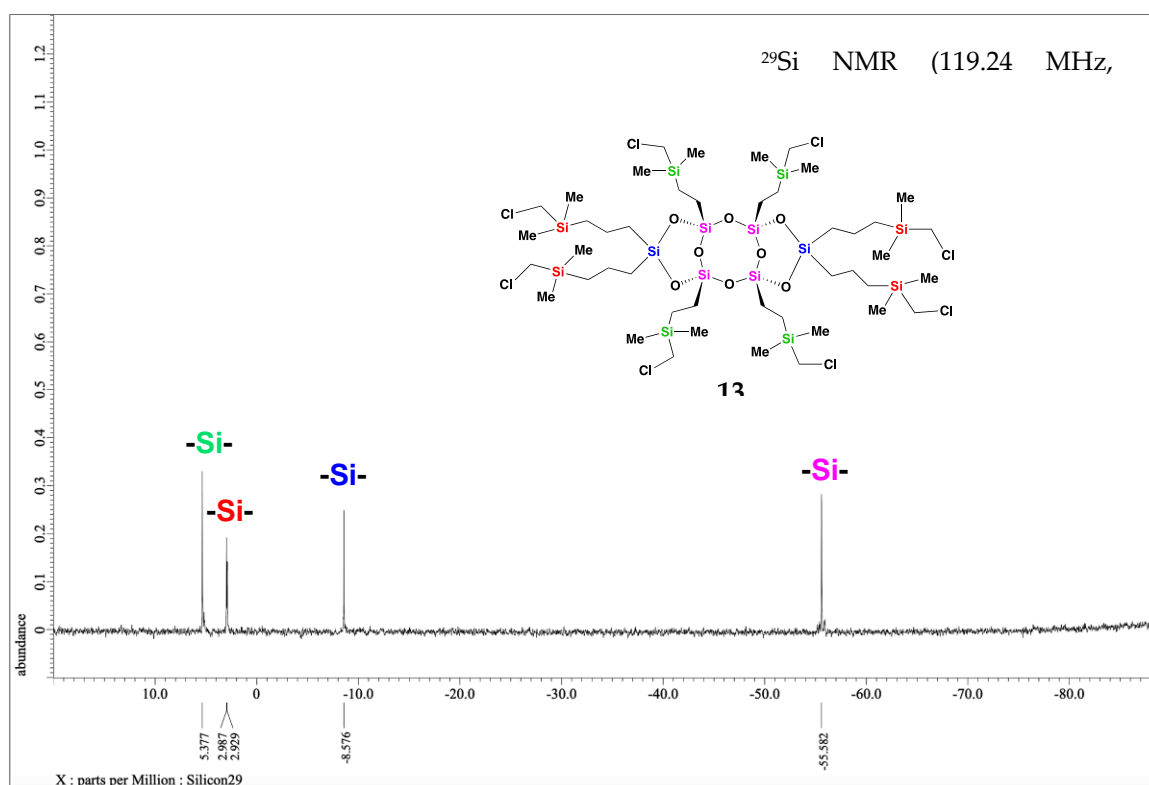Figure S38. <sup>29</sup>Si NMR spectrum for **13**.



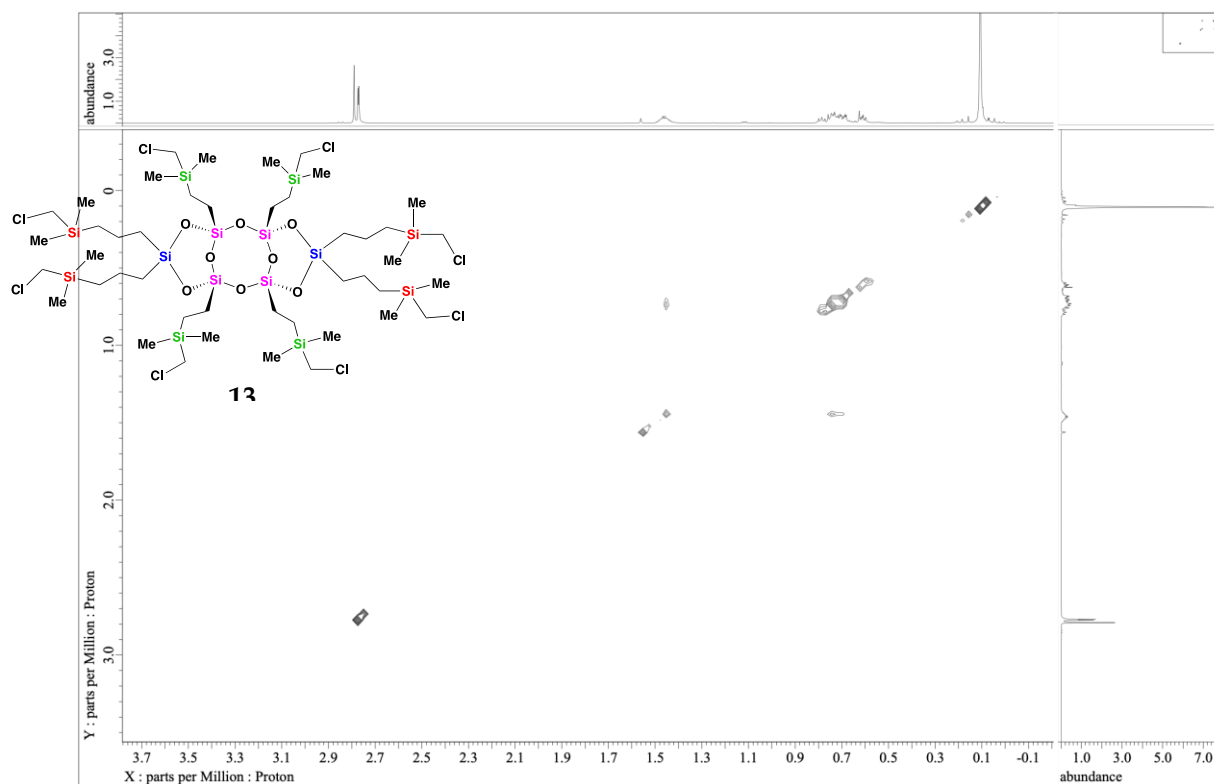Figure S39.  $^1\text{H}$ - $^1\text{H}$  COSY NMR spectrum for **13**.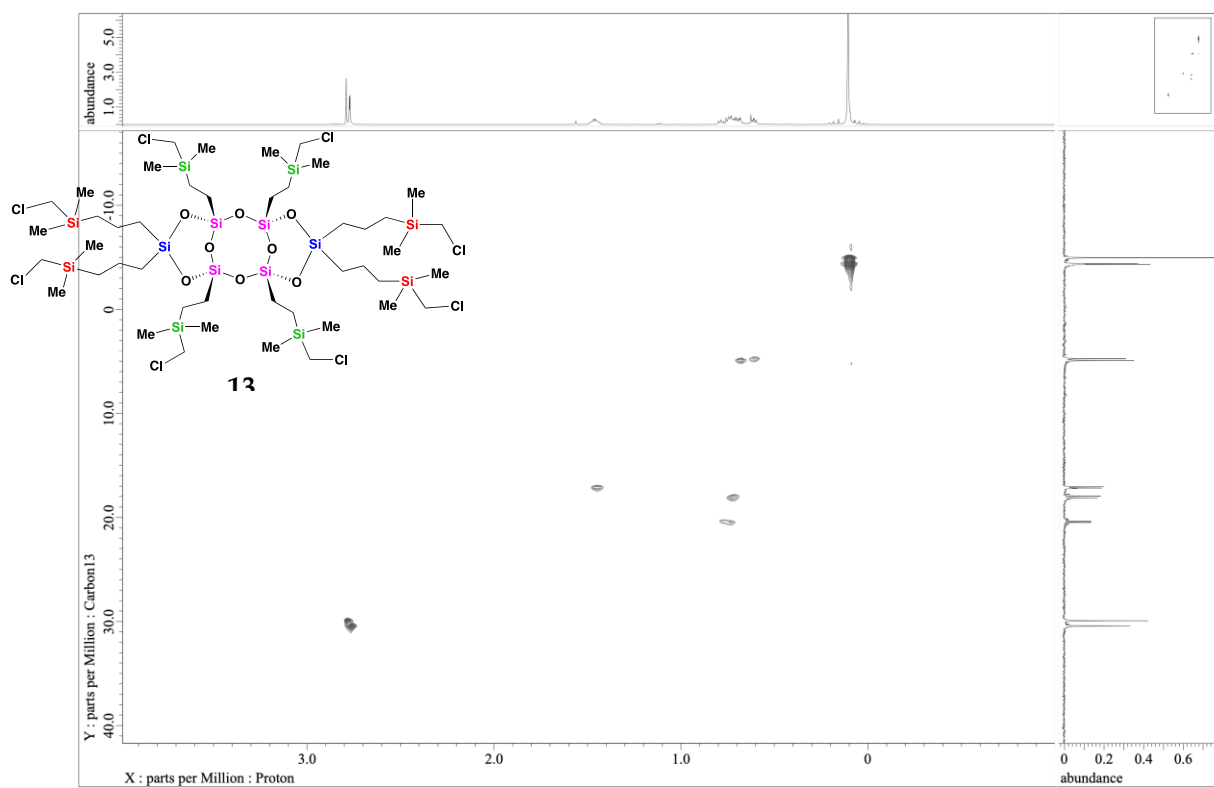Figure S40.  $^1\text{H}$ - $^{13}\text{C}$  HSQC NMR spectrum for **13**.

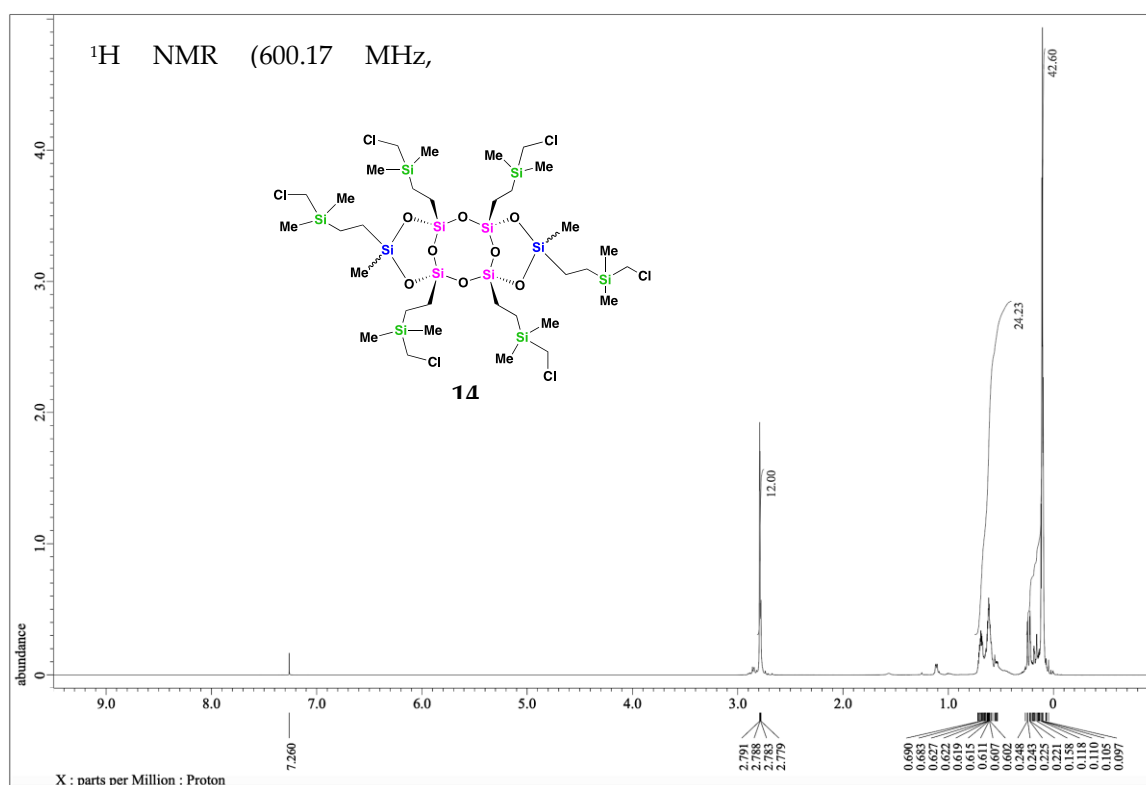Figure S41.  $^1\text{H}$  NMR spectrum for 14.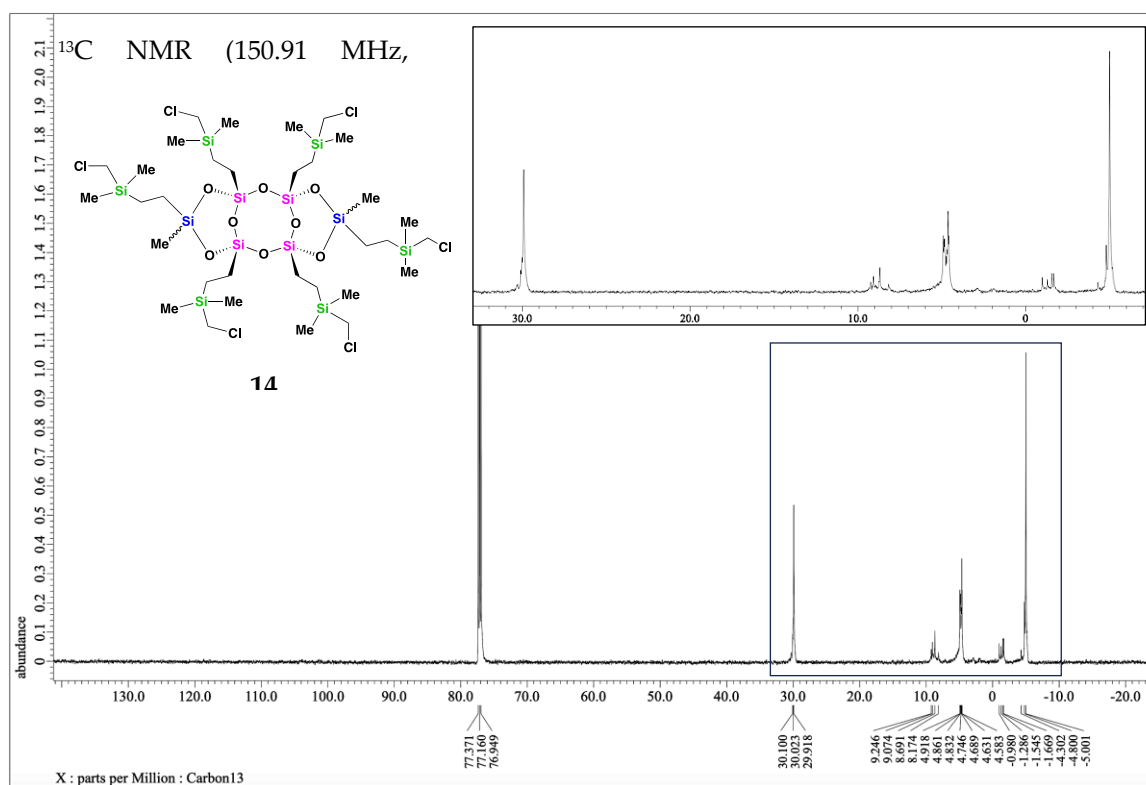Figure S42.  $^{13}\text{C}$  NMR spectrum for 14.

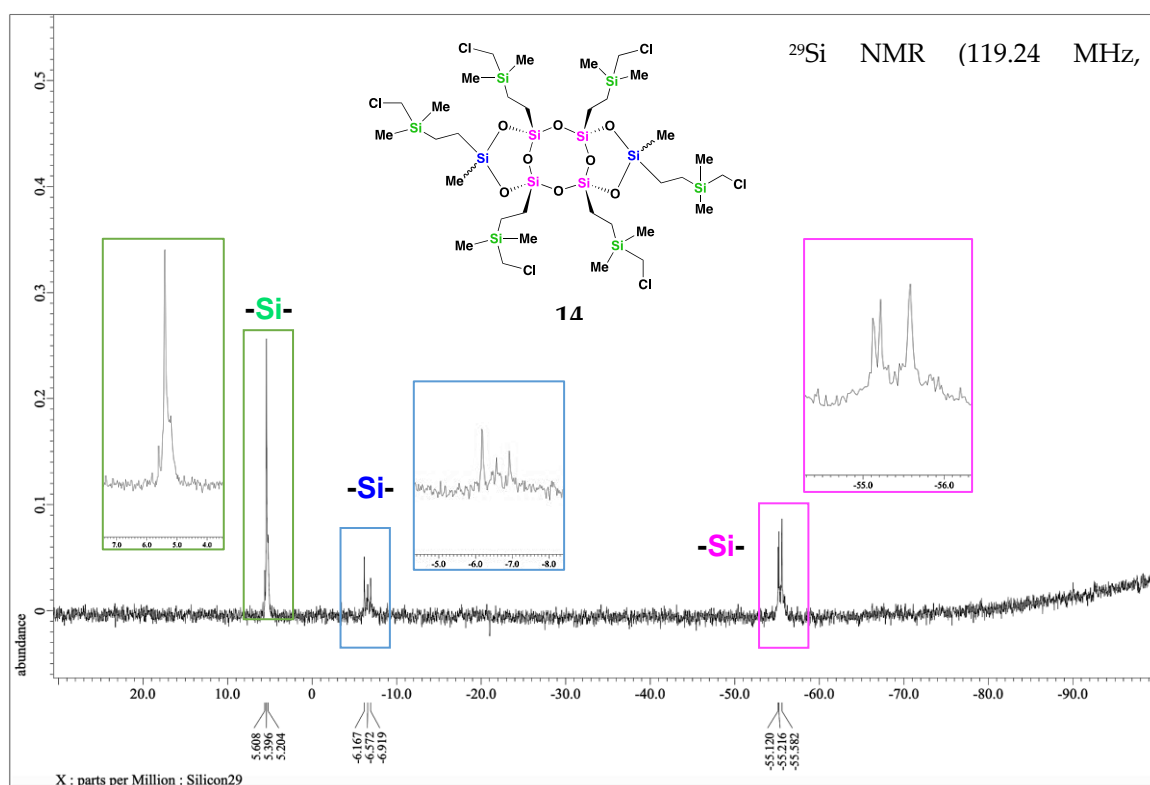Figure S43. <sup>29</sup>Si NMR spectrum for **14**.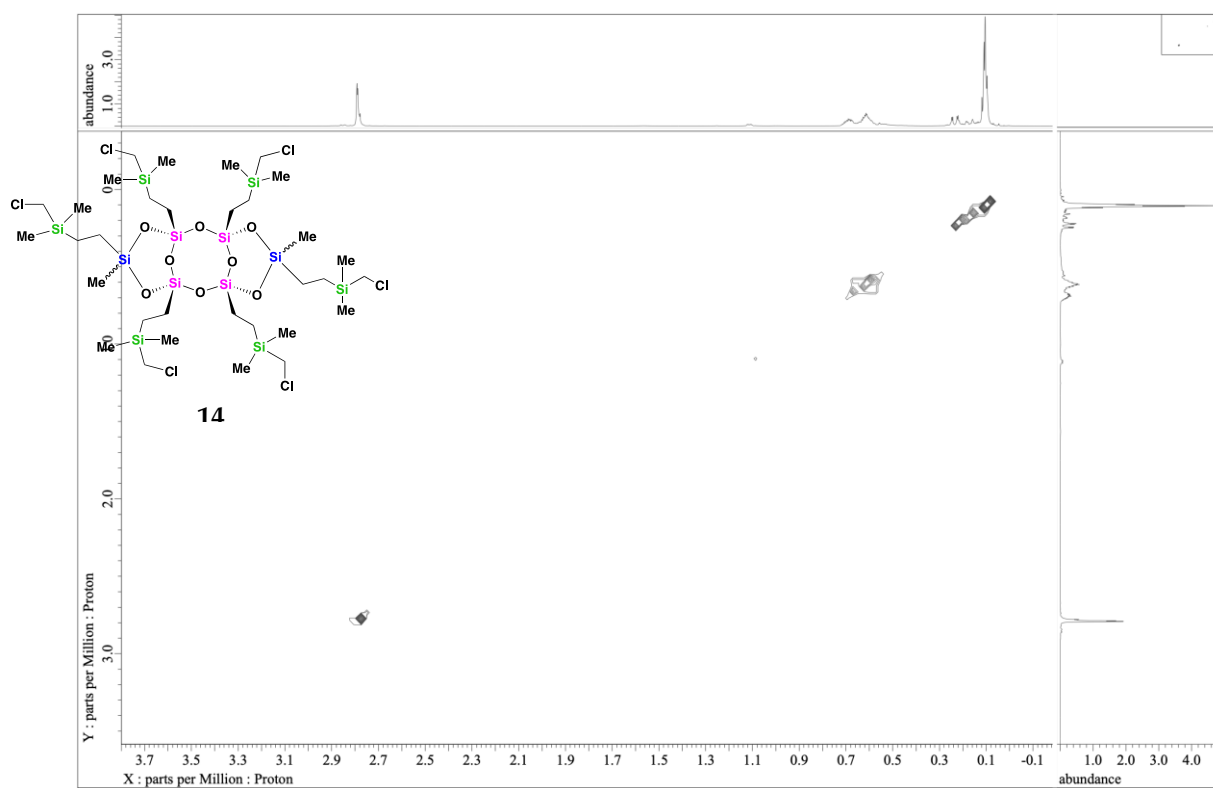Figure S44. <sup>1</sup>H-<sup>1</sup>H COSY NMR spectrum for **14**.

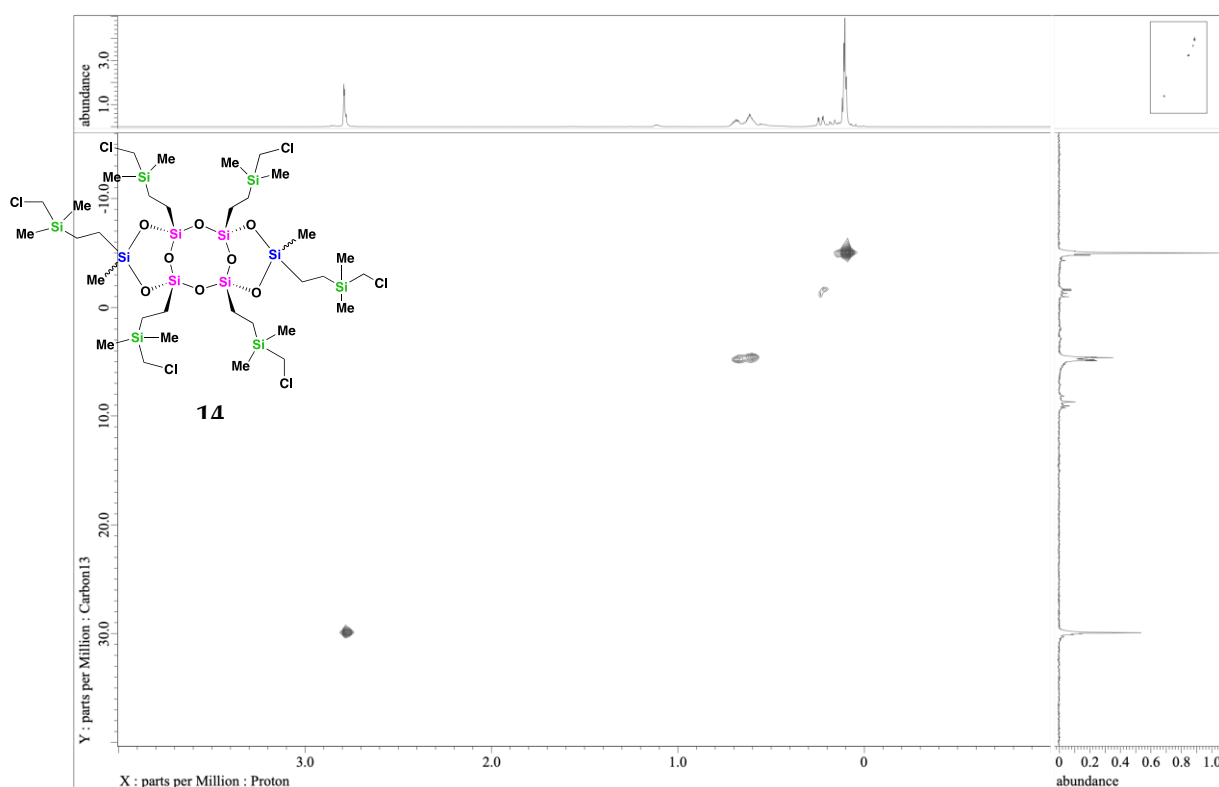Figure S45.  $^1\text{H}$ - $^{13}\text{C}$  HSQC NMR spectrum for **14**.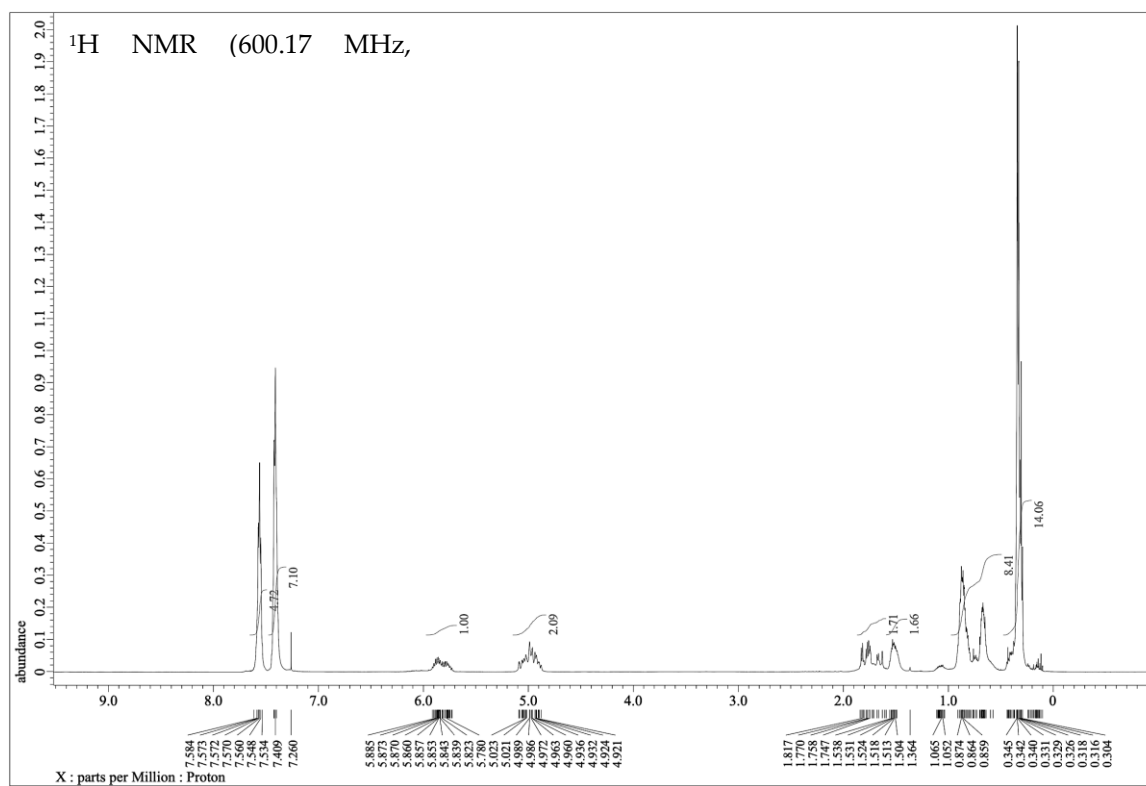Figure S46.  $^1\text{H}$  NMR spectrum for **15**.

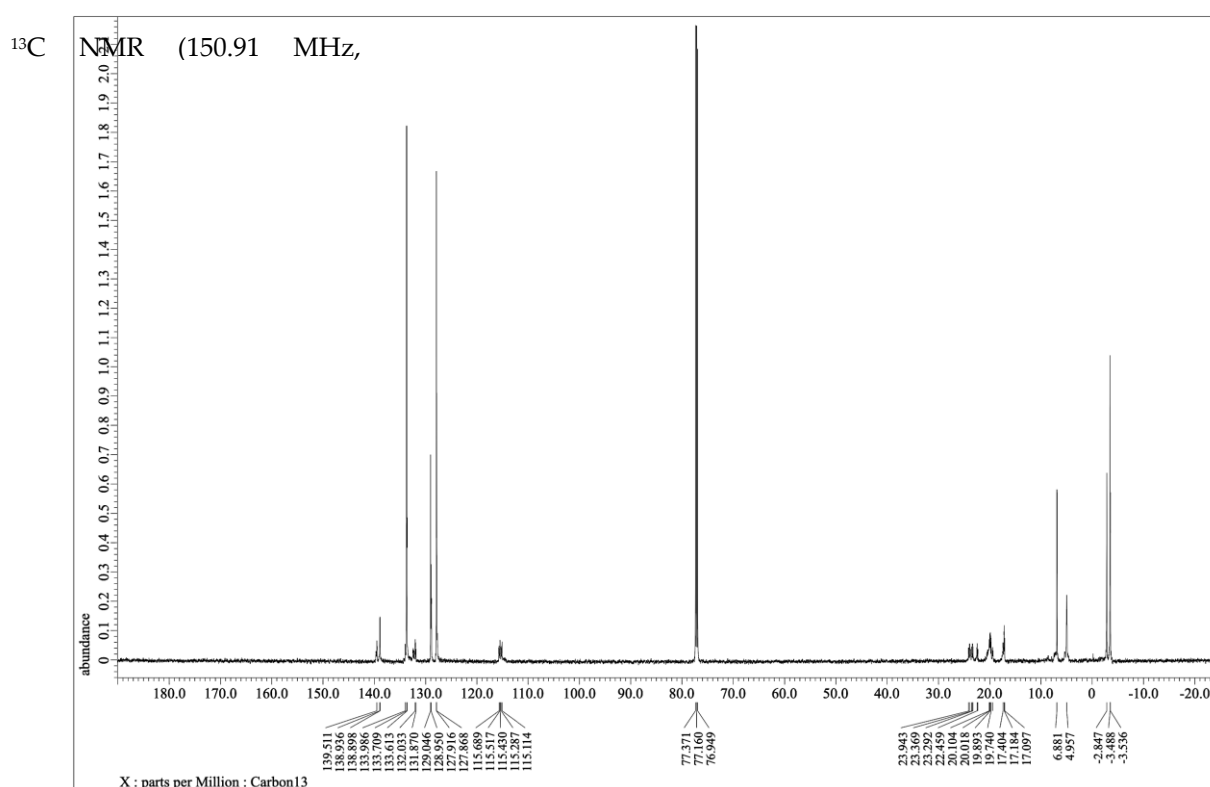Figure S47.  $^{13}\text{C}$  NMR spectrum for 15.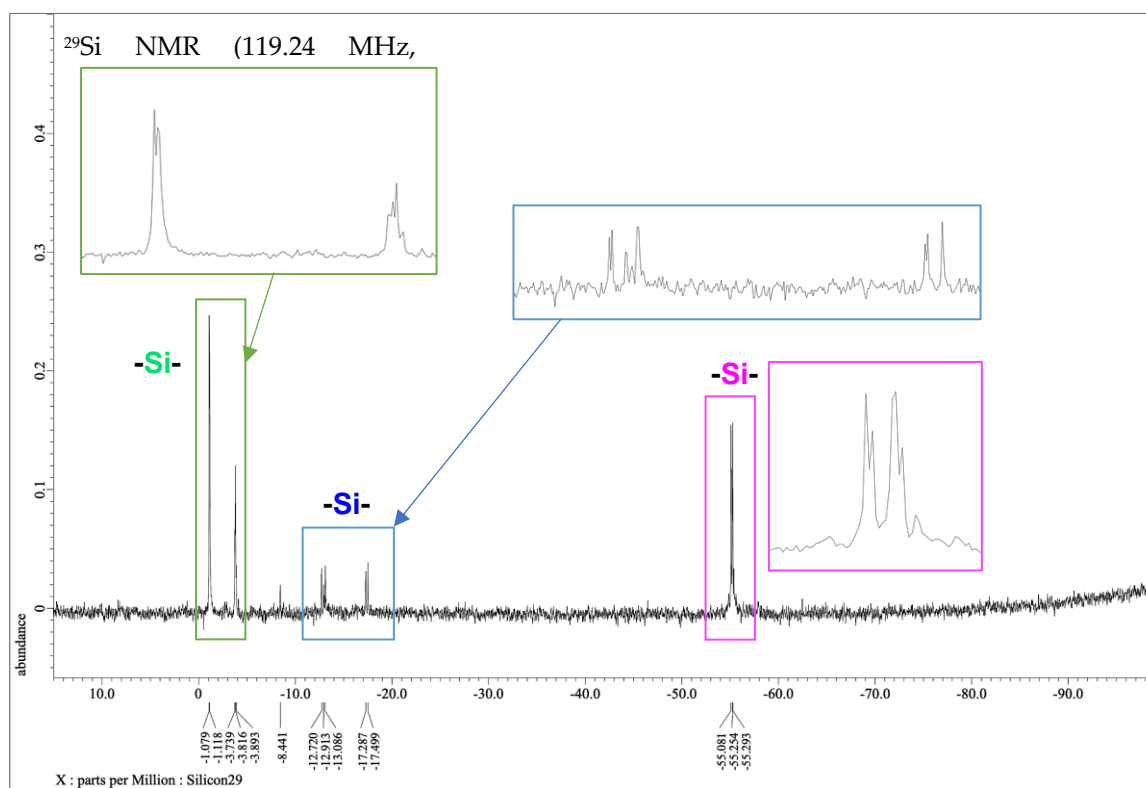Figure S48.  $^{29}\text{Si}$  NMR spectrum for 15.

### 3. MALDI-TOF MS Spectra for synthetic compounds 6-15

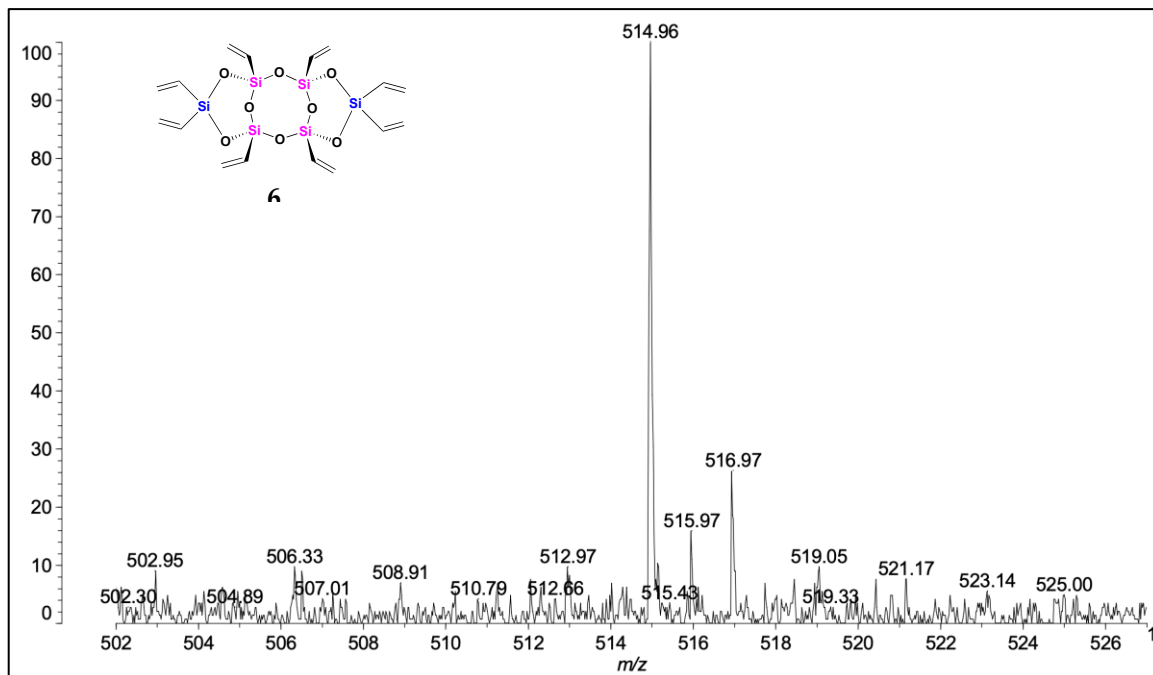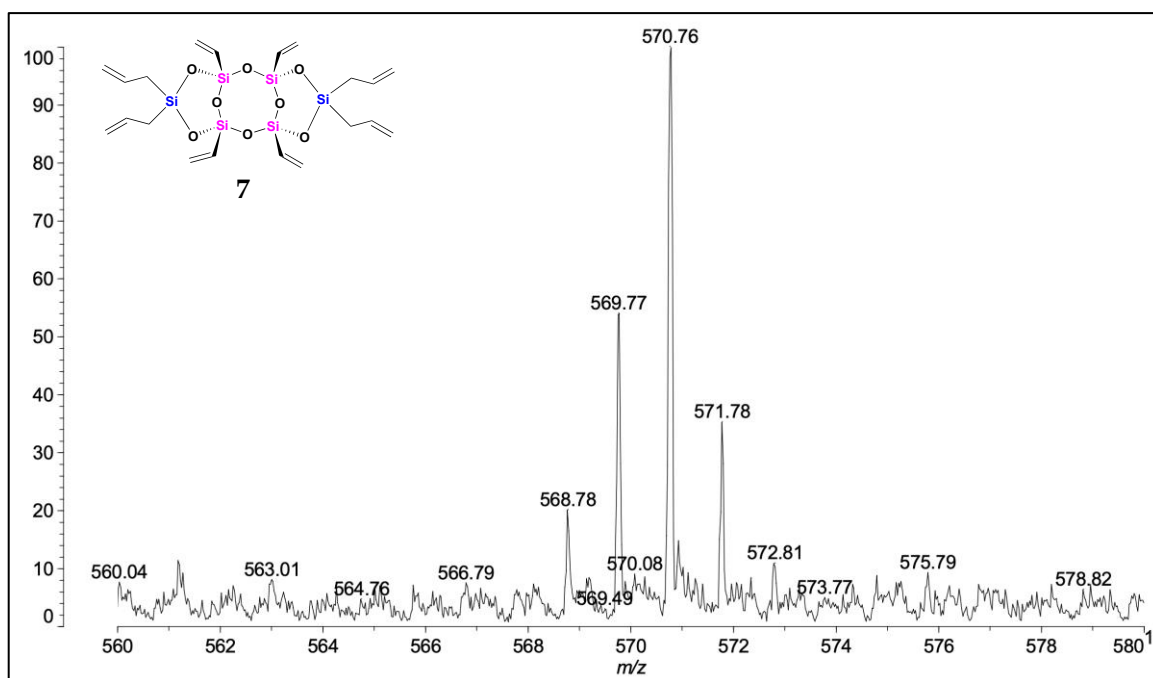

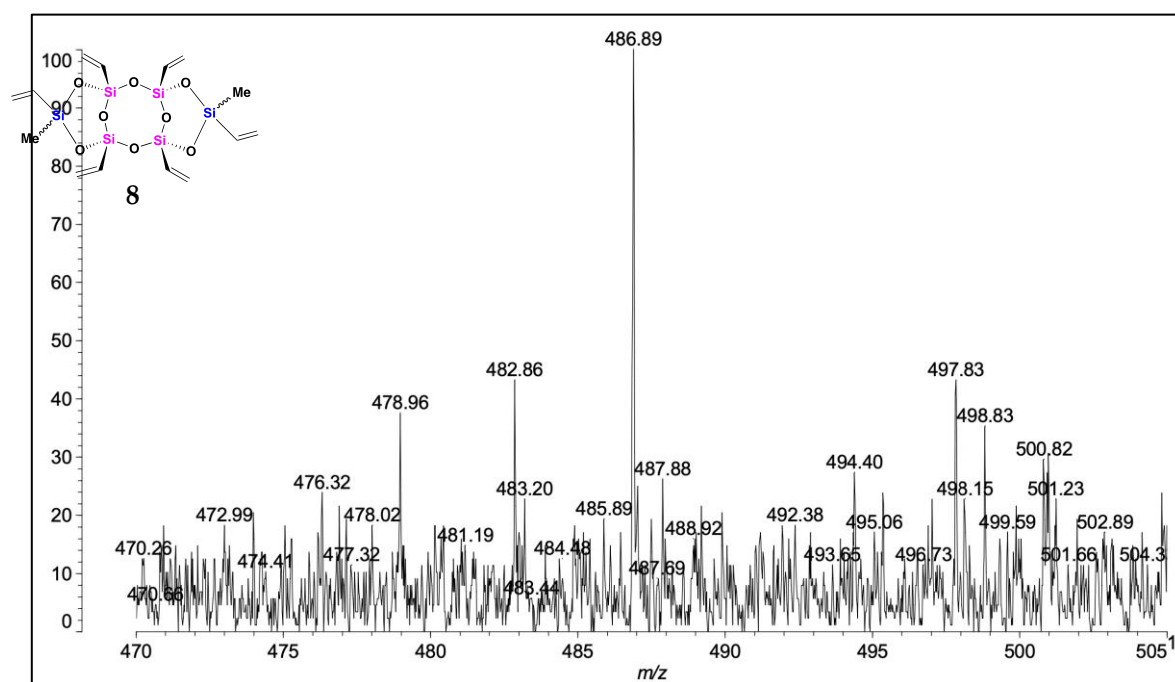

Figure S51. MALDI-TOF MS spectrum for 8.

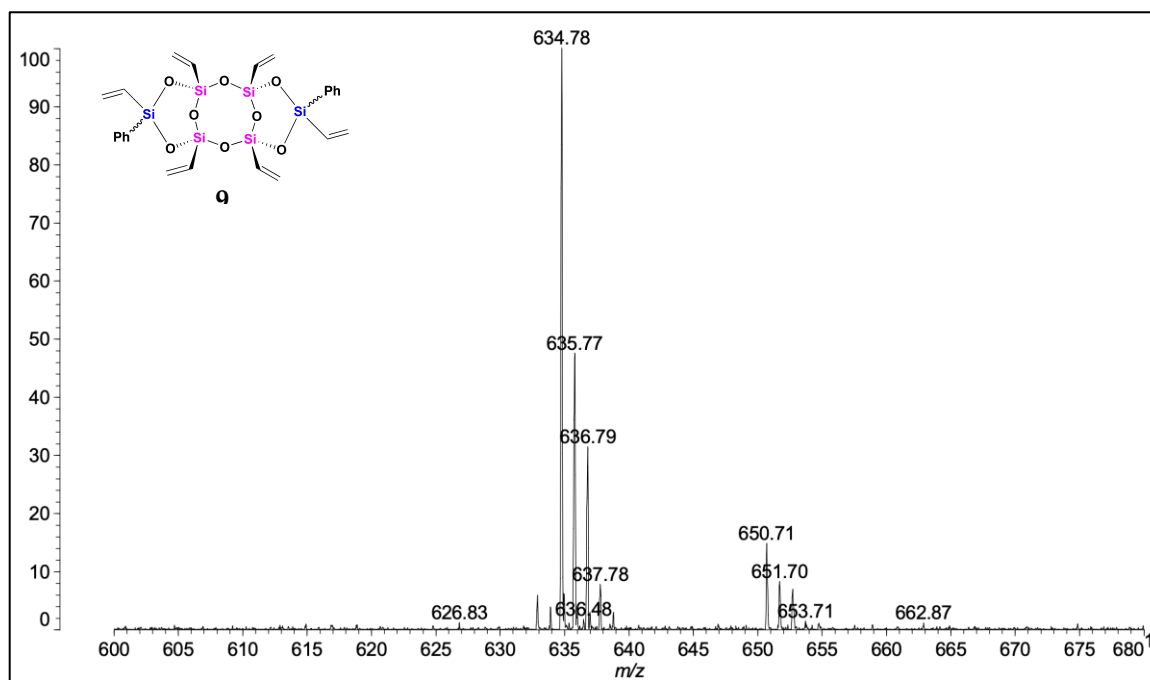

Figure S52. MALDI-TOF MS spectrum for 9.

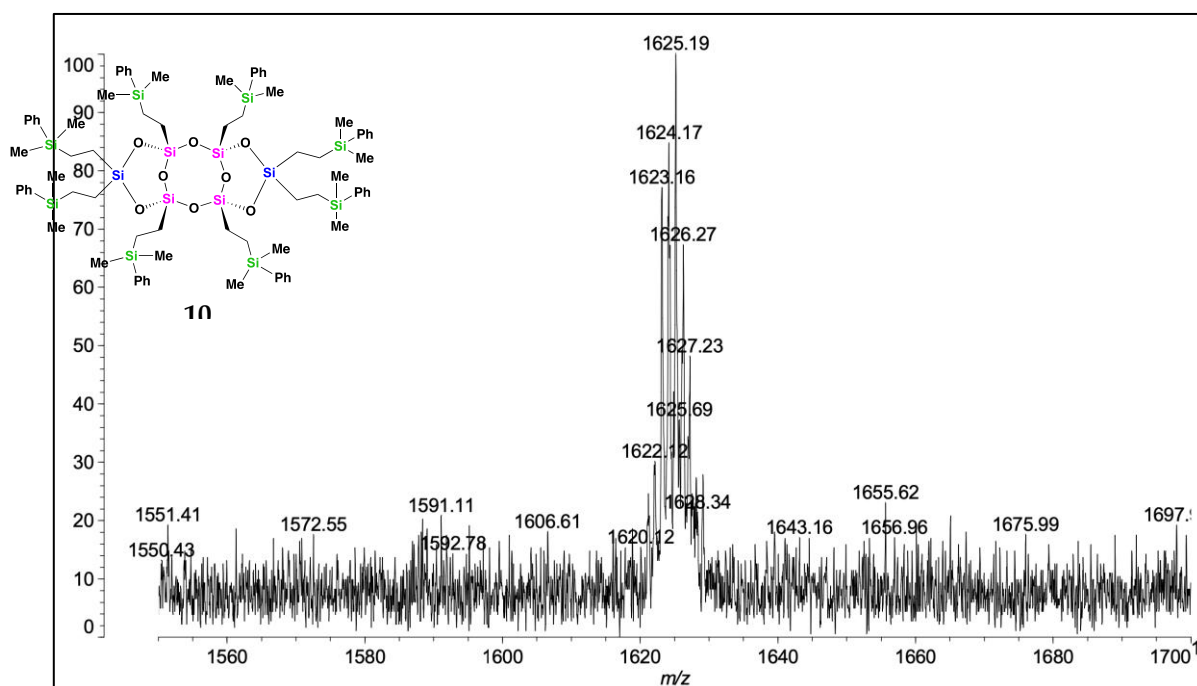Figure S53. MALDI-TOF MS spectrum for **10**.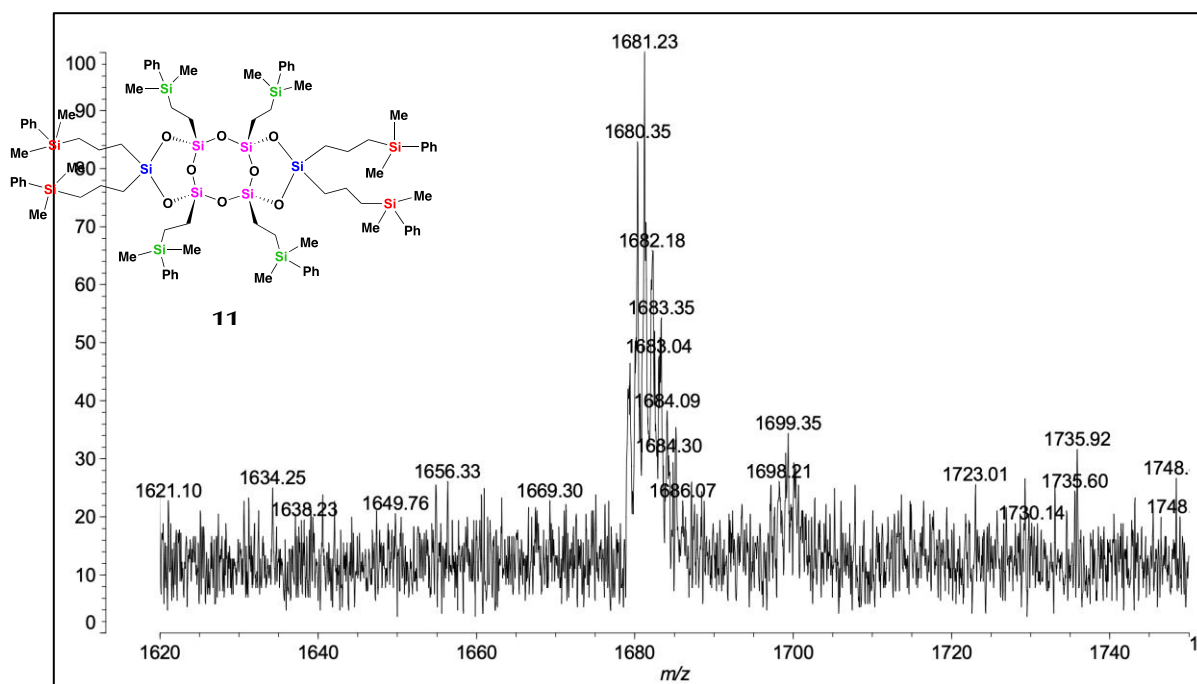Figure S54. MALDI-TOF MS spectrum for **11**.



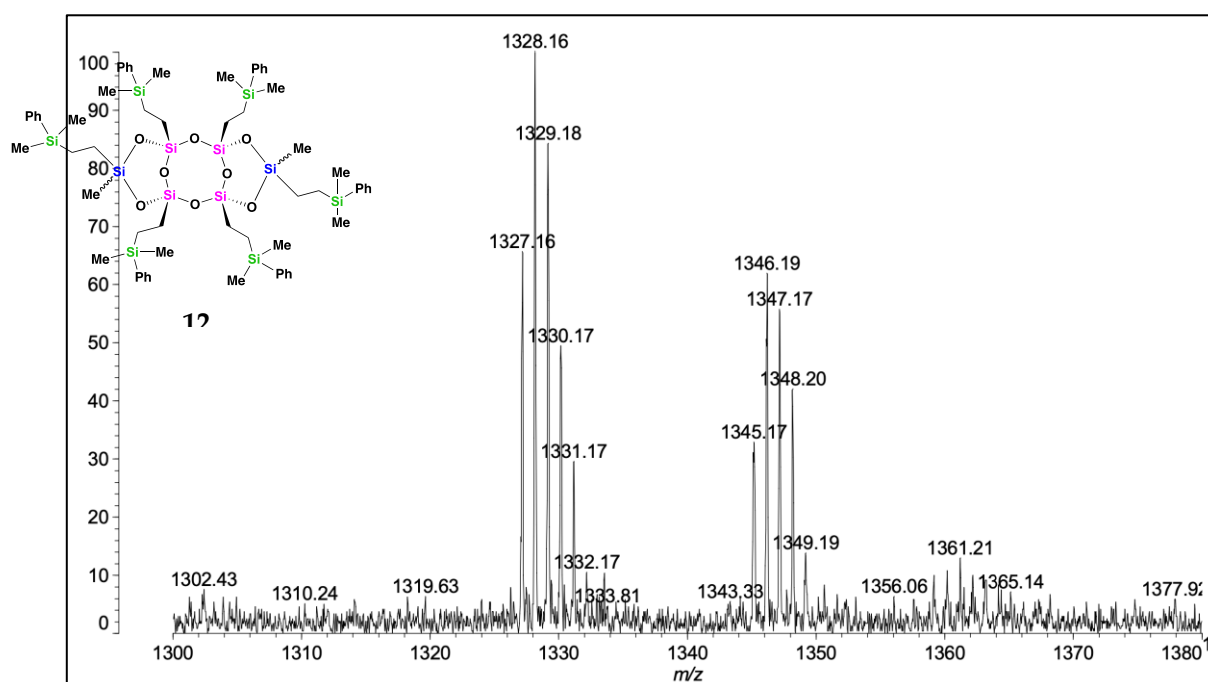Figure S55. MALDI-TOF MS spectrum for **12**.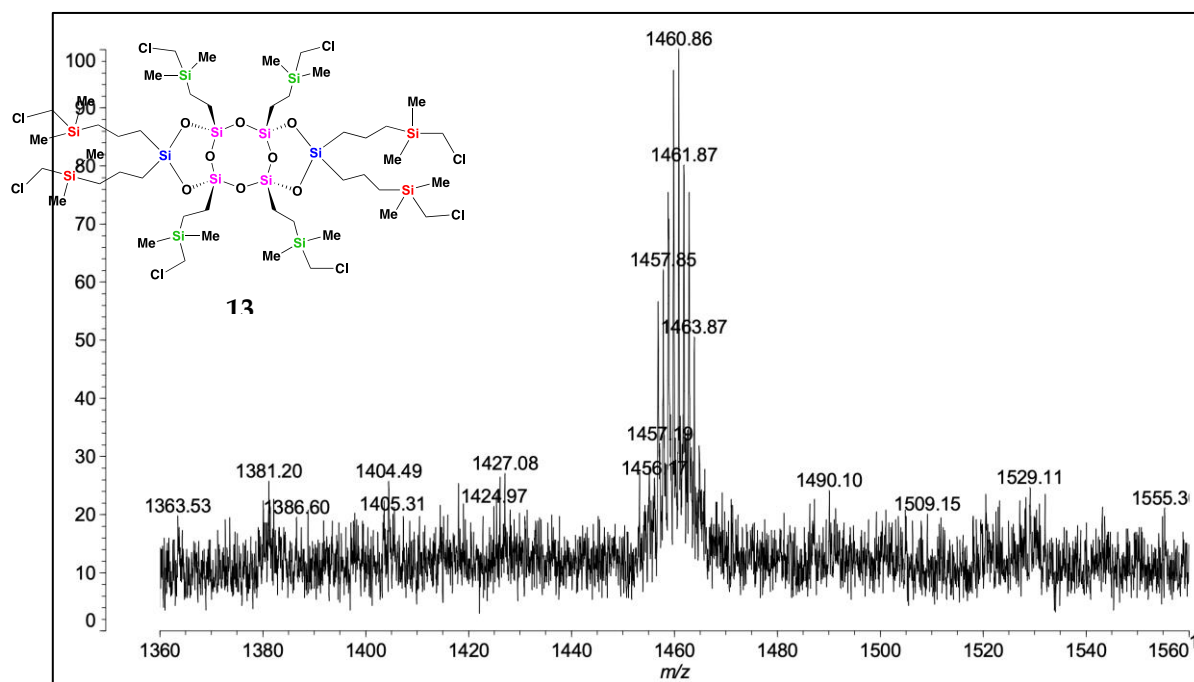Figure S56. MALDI-TOF MS spectrum for **13**.

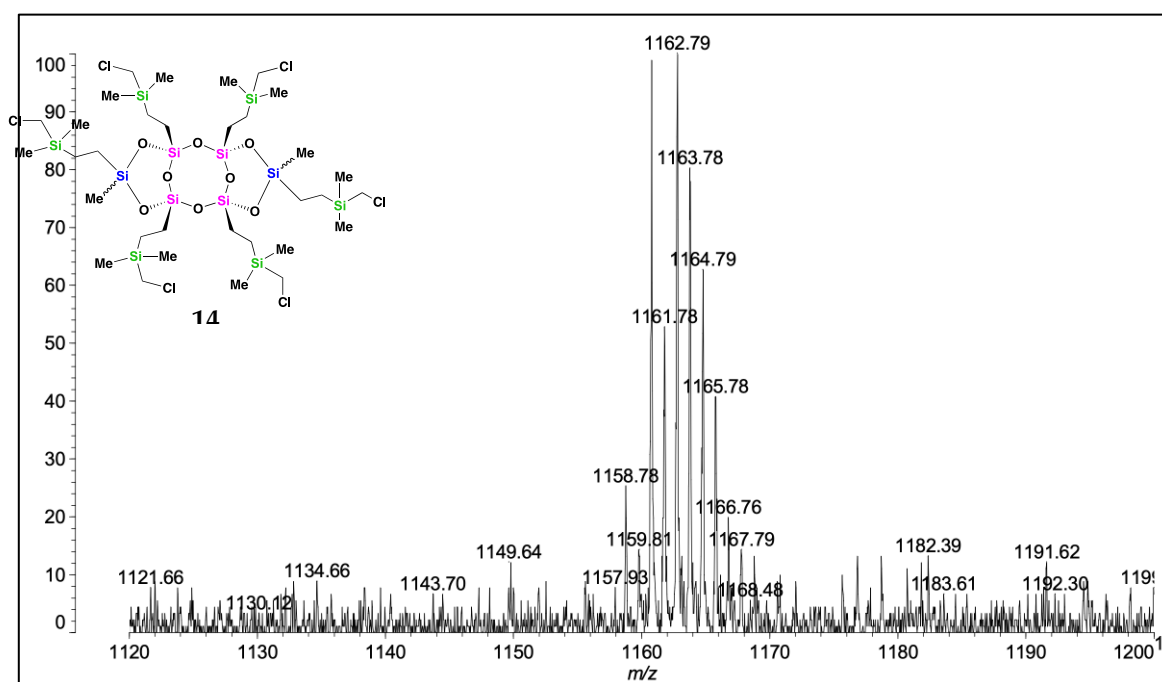Figure S57. MALDI-TOF MS spectrum for **14**.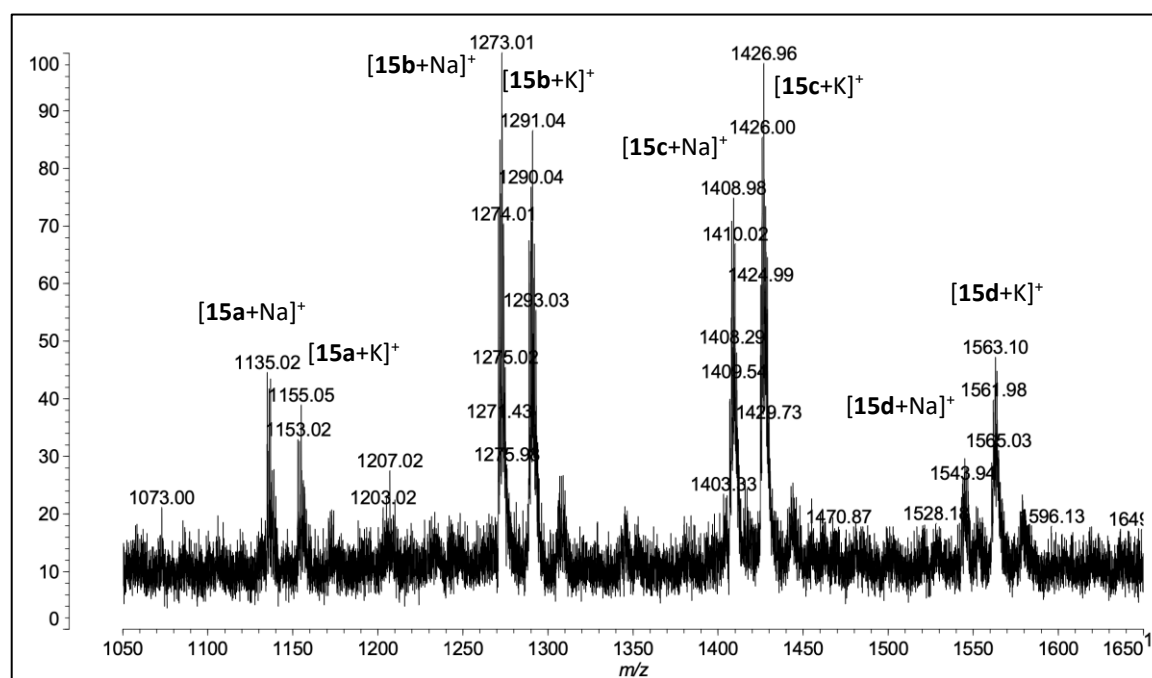Figure S58. MALDI-TOF MS spectrum for **15**.

#### 4. Thermogravimetry/Differential Thermal Analysis (TG/DTA) for compounds 6-14

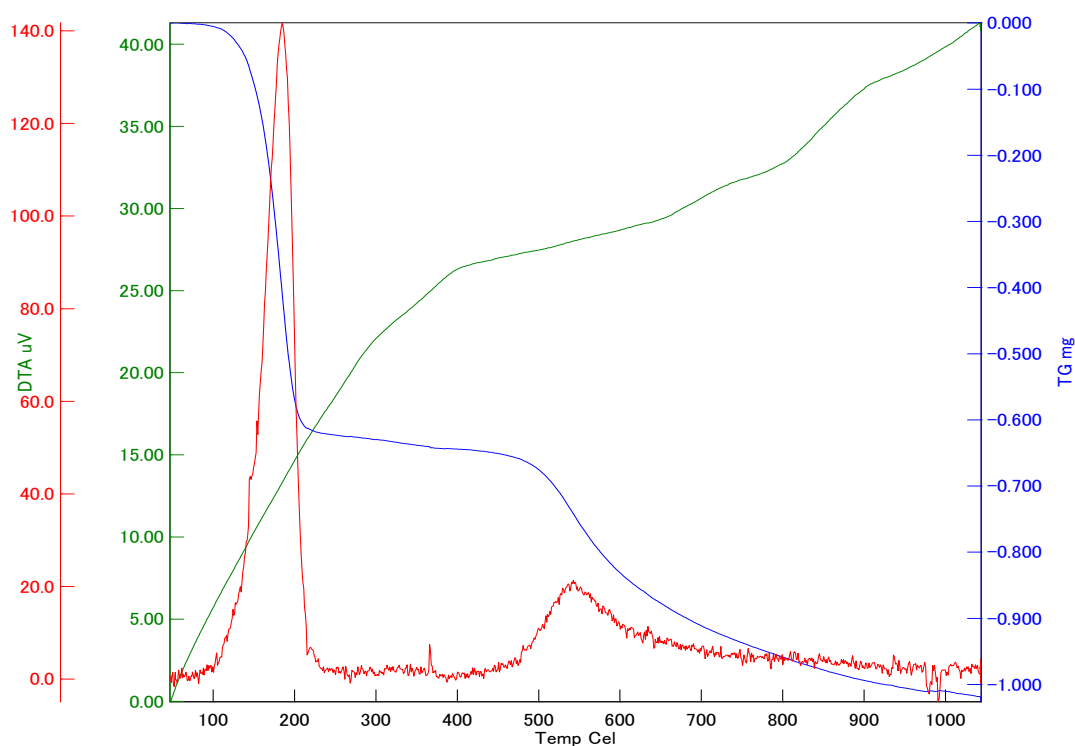

Figure S59. TG/DTA spectrum for 6 under N<sub>2</sub>.

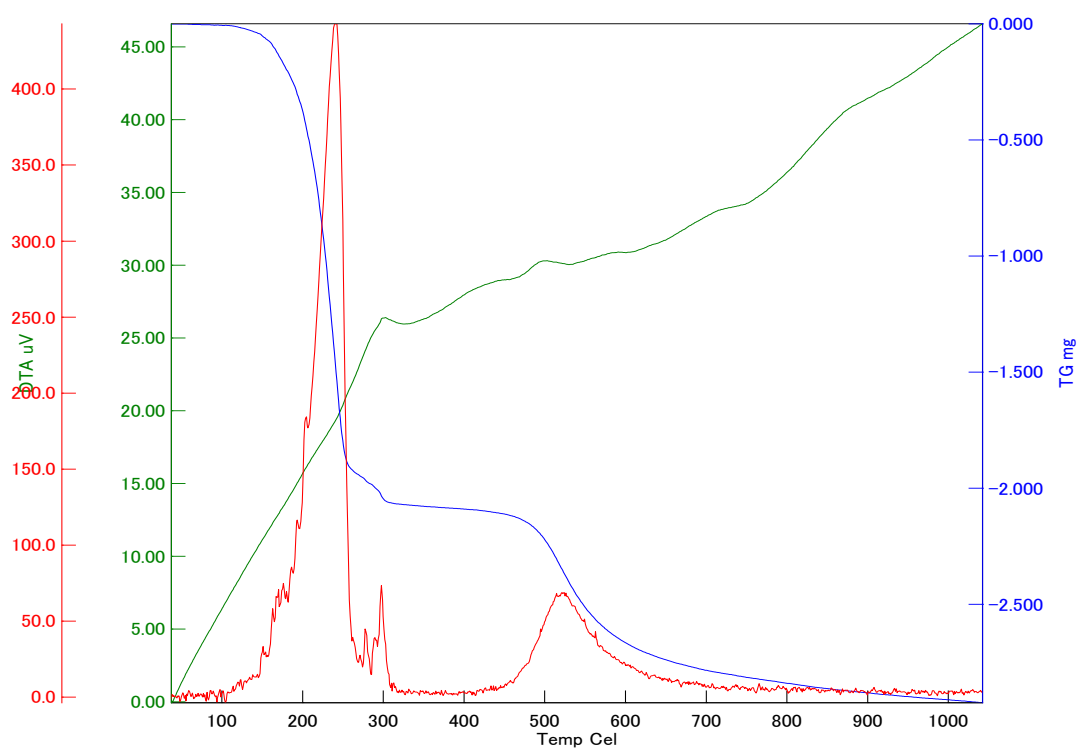

Figure S60. TG/DTA spectrum for 7 under N<sub>2</sub>.

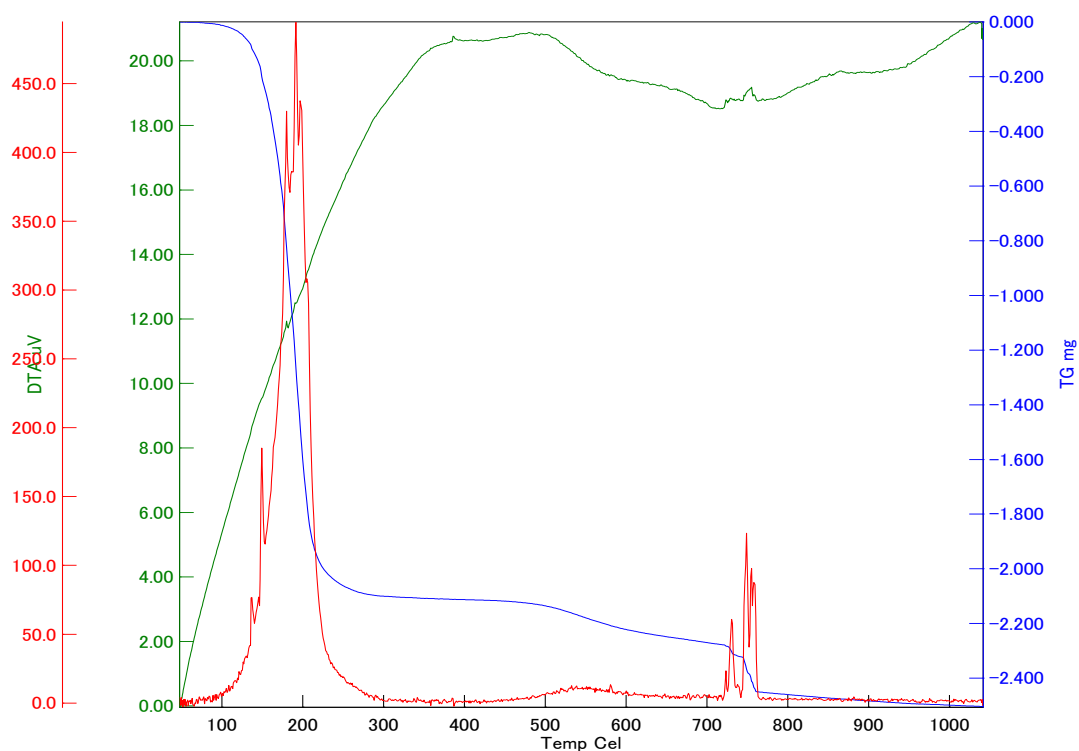Figure S61. TG/DTA spectrum for 8 under N<sub>2</sub>.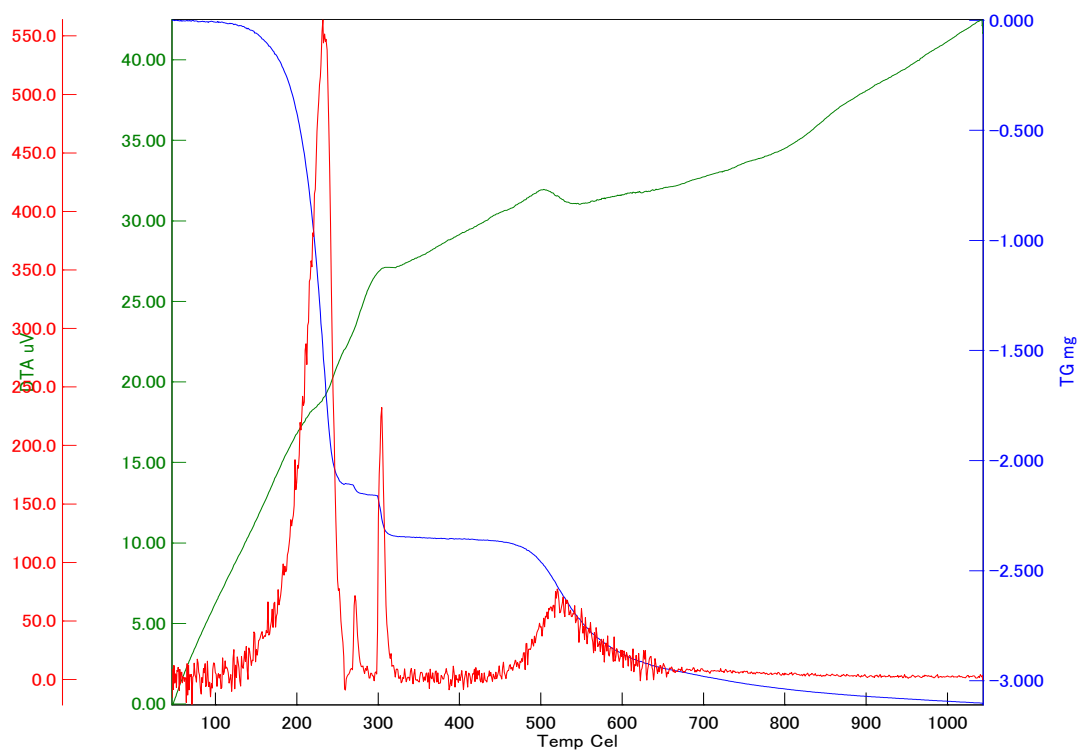Figure S62. TG/DTA spectrum for 9 under N<sub>2</sub>.

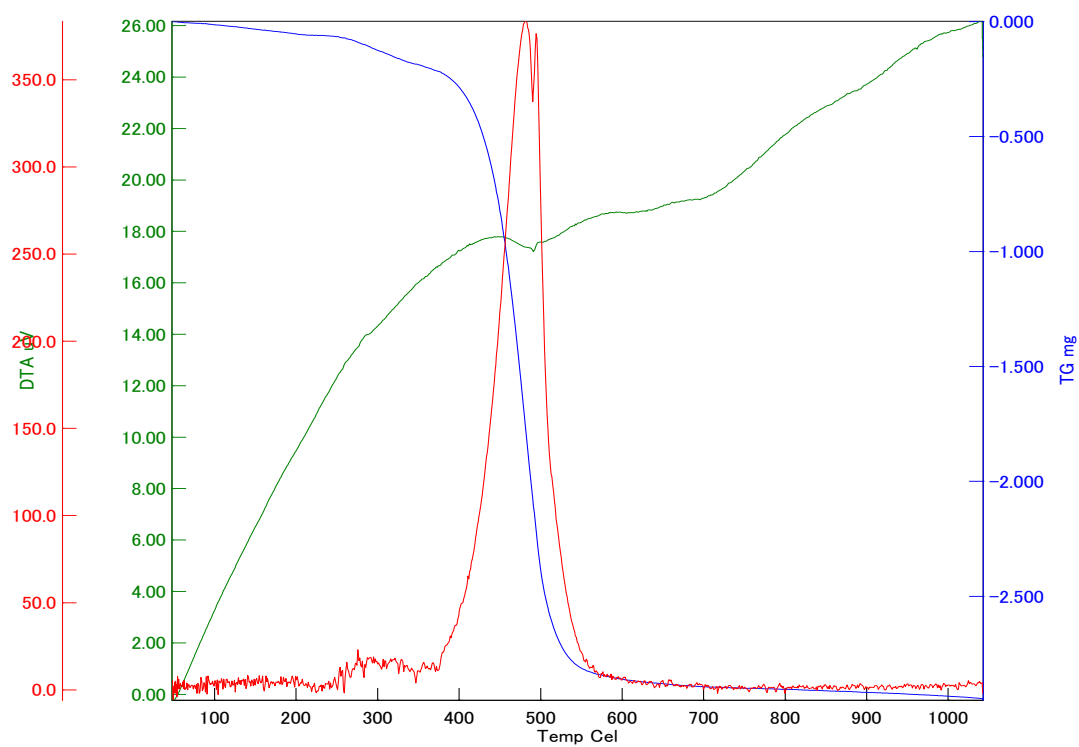

Figure S63. TG/DTA spectrum for 10 under N<sub>2</sub>.

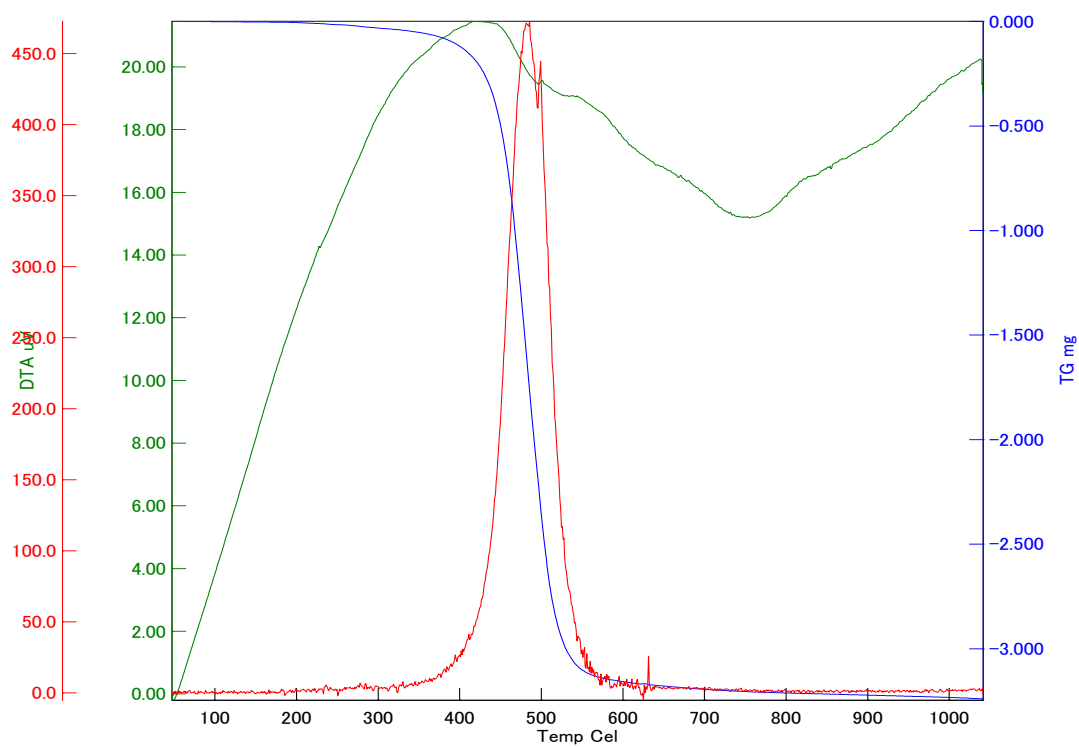

Figure S64. TG/DTA spectrum for 11 under N<sub>2</sub>.

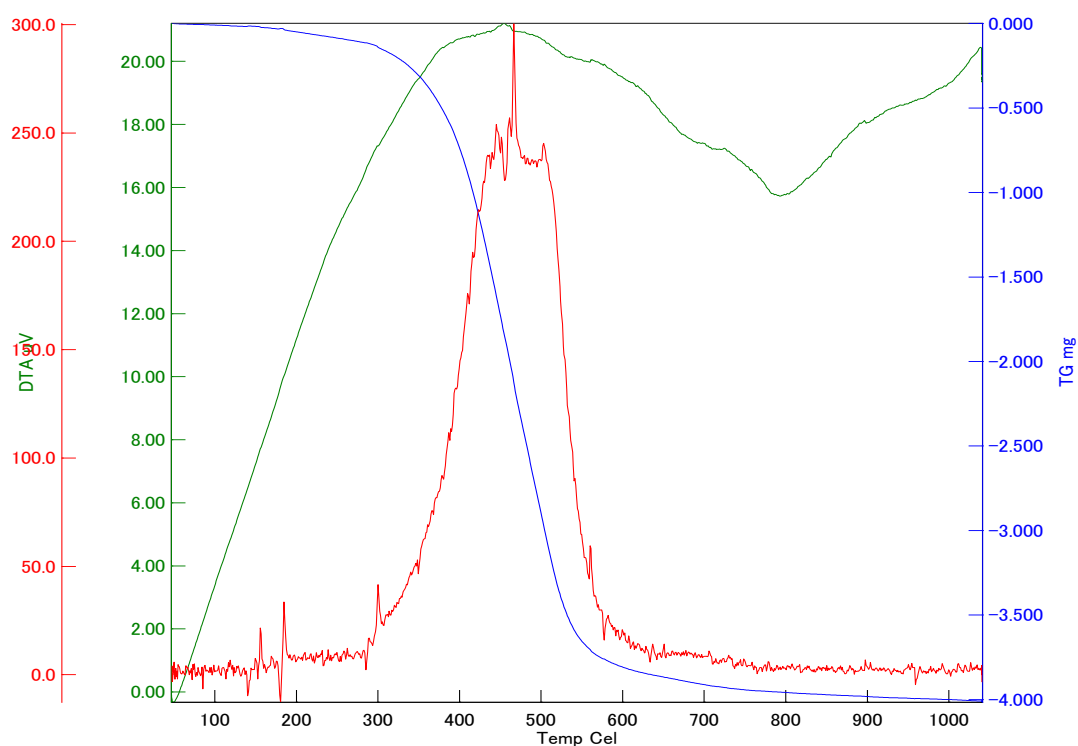

Figure S65. TG/DTA spectrum for 12 under N<sub>2</sub>.

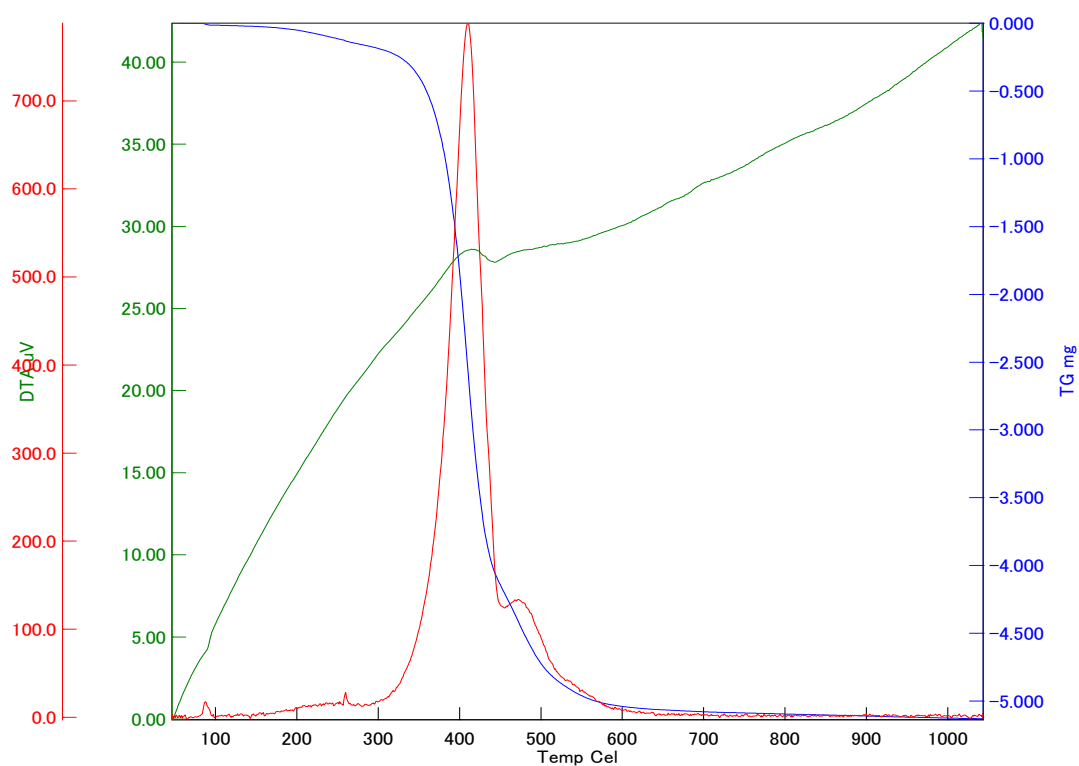

Figure S66. TG/DTA spectrum for 13 under N<sub>2</sub>.

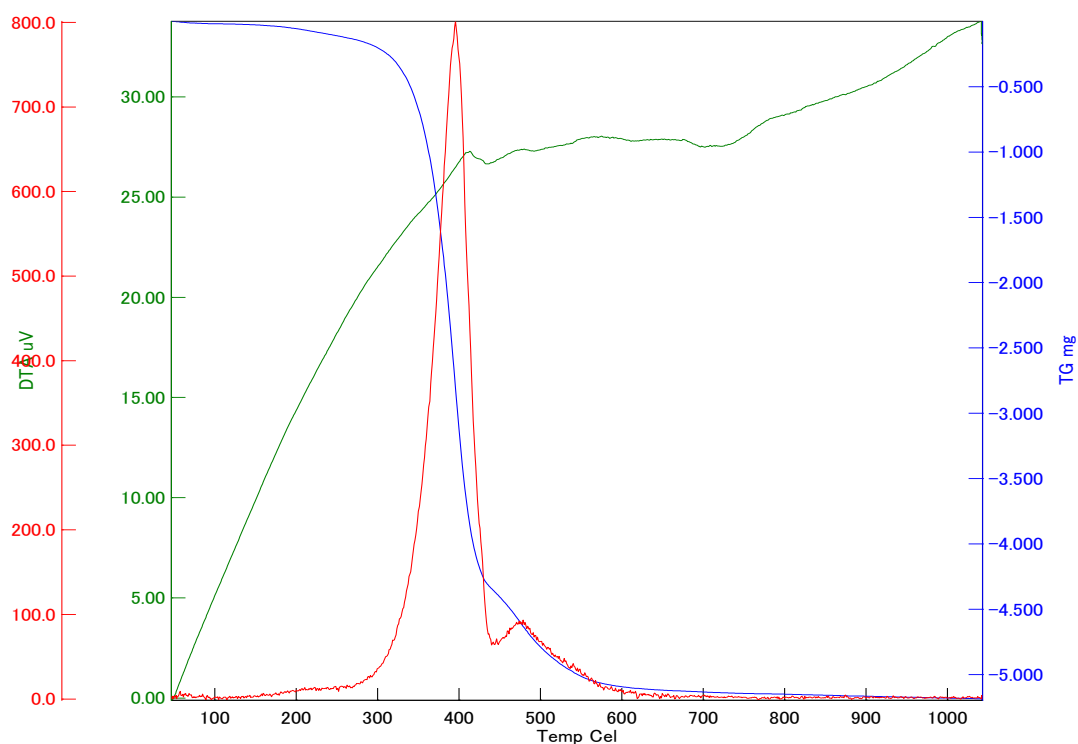

**Figure S67.** TG/DTA spectrum for **14** under N<sub>2</sub>.

**Table S1.** Thermal properties for compounds **6-14** under N<sub>2</sub>.

| Compounds | Td <sub>5</sub> (°C) | Residue at 1000 °C (%) |
|-----------|----------------------|------------------------|
| <b>6</b>  | 172                  | 80                     |
| <b>7</b>  | 196                  | 55                     |
| <b>8</b>  | 148                  | 24                     |
| <b>9</b>  | 198                  | 60                     |
| <b>10</b> | 340                  | 18                     |
| <b>11</b> | 422                  | 20                     |
| <b>12</b> | 348                  | 33                     |
| <b>13</b> | 333                  | 10                     |
| <b>14</b> | 323                  | 17                     |
